# Supplementary material for: Interleukin-6 Induced Proliferation Is Attenuated by Transforming Growth Factor-β-Induced Signaling in Human Hepatocellular Carcinoma Cells
Source: PubMed Central journal article supplement (PMC8810489; doi:10.3389/fonc.2021.811941), 2022-01-20
Supplement: DataSheet_1.pdf [file DataSheet_1.pdf]

**Figure: 2**

a. Cell: Huh7 Cytokine: IL-6 Time point: 48 hours

Experiment: MTT Assay

|   | A          | B          |
|---|------------|------------|
|   | Control    | IL-6       |
| Y | Y          | Y          |
| 1 | 100.000000 | 131.492000 |
| 2 | 100.000000 | 156.086200 |
| 3 | 100.000000 | 143.651000 |

a . Cell: Huh7 Cytokine: IL-6 Time point: 72 hours

Experiment: MTT Assay

|   | A        | B          |
|---|----------|------------|
|   | Control  | IL-6       |
| Y | Y        | Y          |
| 1 | 100.0000 | 161.748100 |
| 2 | 100.0000 | 169.630000 |
| 3 | 100.0000 | 177.568900 |

c. Cell: Huh7 Cytokine: IL-6 Time point: 72 hours

Experiment: RT-PCR:Ki67

|   | A       | B       |
|---|---------|---------|
|   | Control | IL-6    |
| Y | Y       | Y       |
| 1 | 1.00    | 224.710 |
| 2 | 1.00    | 376.100 |
| 3 | 1.00    | 300.405 |

c. Cell: Huh7 Cytokine: IL-6 Time point: 72 hours

Experiment: RT-PCR:PCNA

|   | A       | B     |
|---|---------|-------|
|   | Control | IL-6  |
| Y | Y       | Y     |
| 1 | 1.00    | 38.97 |
| 2 | 1.00    | 52.95 |
| 3 | 1.00    | 45.96 |

c. Cell: Huh7 Cytokine: IL-6 Time point: 72 hours

Experiment: Western Blotting : PCNA(CST),  $\beta$ -Actin( Biobharati)

Control IL-6

BITS 2020-10-07 22hr 10min\_Exposure\_400.0sec

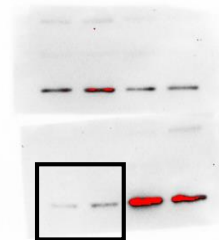

PCNA  
30kDa

BITS 2020-10-06 19hr 50min\_Exposure\_10.0sec

$\beta$ -Actin  
42 kDa

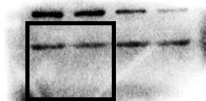

d. Cell: Huh7 Cytokine: IL-6 Time point: 72 hours

Experiment: RT-PCR:IL-6R

|   | A       | B      |
|---|---------|--------|
|   | Control | IL-6   |
| Y | Y       | Y      |
| 1 | 1.00    | 207.72 |
| 2 | 1.00    | 313.12 |
| 3 | 1.00    |        |
| 4 | 1.00    | 260.42 |

Figure3

a. Cell: Huh7 Cytokine: IL-6 Time point: 72 hours

Experiment: Western Blotting: ph-STAT3(CST), Total STAT3(CST)  $\beta$ -Actin( Biobharati)

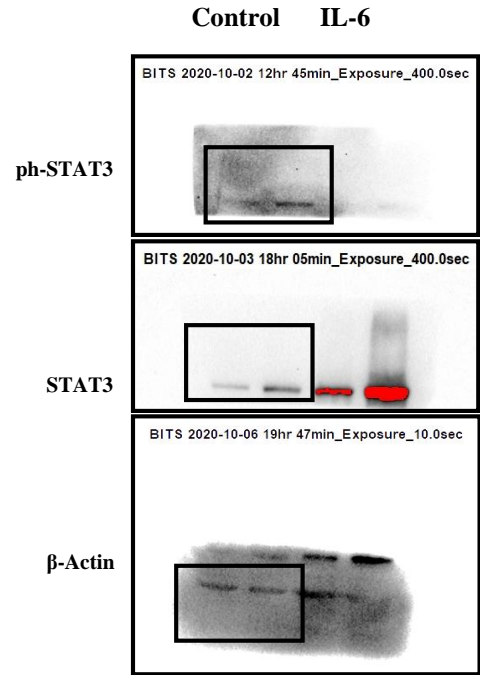

(b) Cell: Huh7 Cytokine: IL-6 Time point: 4 hours Experiment: Immunofluorescence Total STAT3(CST)

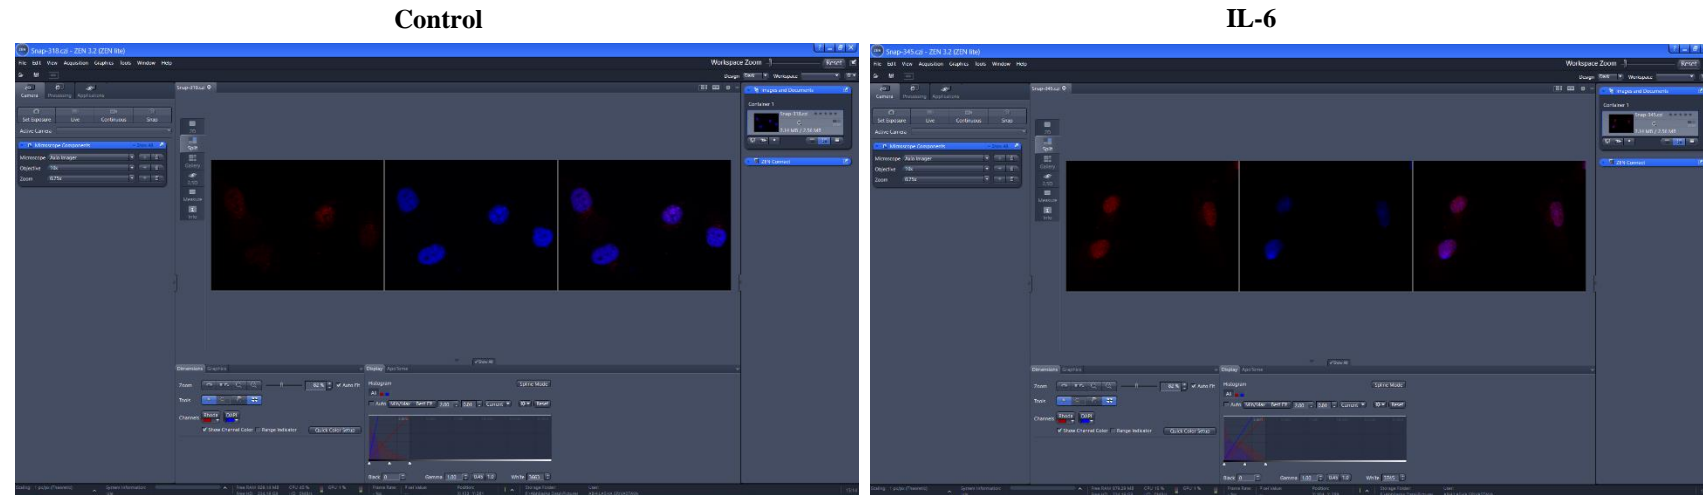

(c) (ii) Cell: Huh7 Cytokine: IL-6 and Static Time point: 24 hours Experiment: Annexin-PI (Flow cytometry)

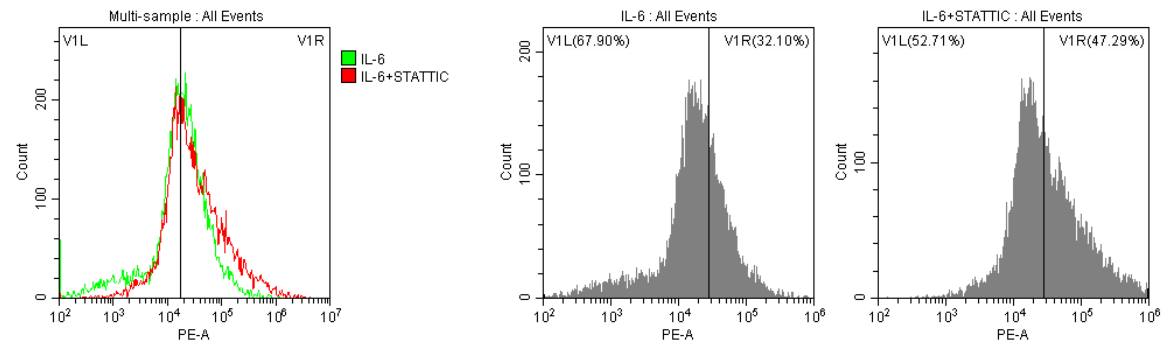

Continued on the next slide

d. Cell: Huh7 Cytokine: IL-6 Time point: 72 hours

Experiment: Western Blotting: ph-STAT3(CST), Total STAT3(CST),PCNA(CST)  $\beta$ -Actin( Biobharati)

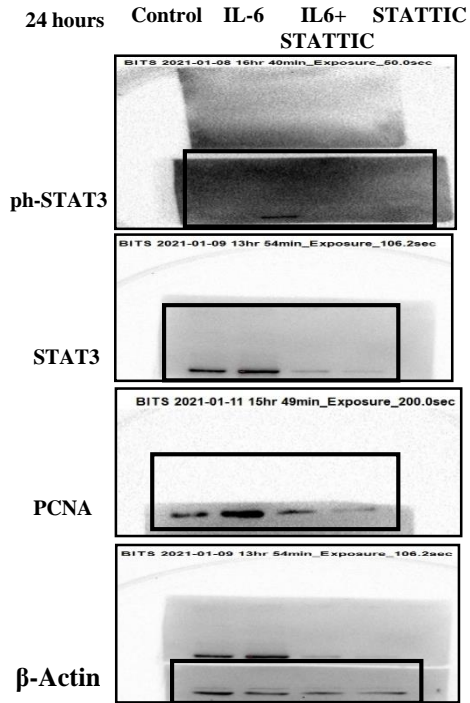

e. Cell: Huh7 Cytokine: IL-6 and Stattic Time point: 24 hours

Experiment: Flow cytometer: DCFDA:ROS

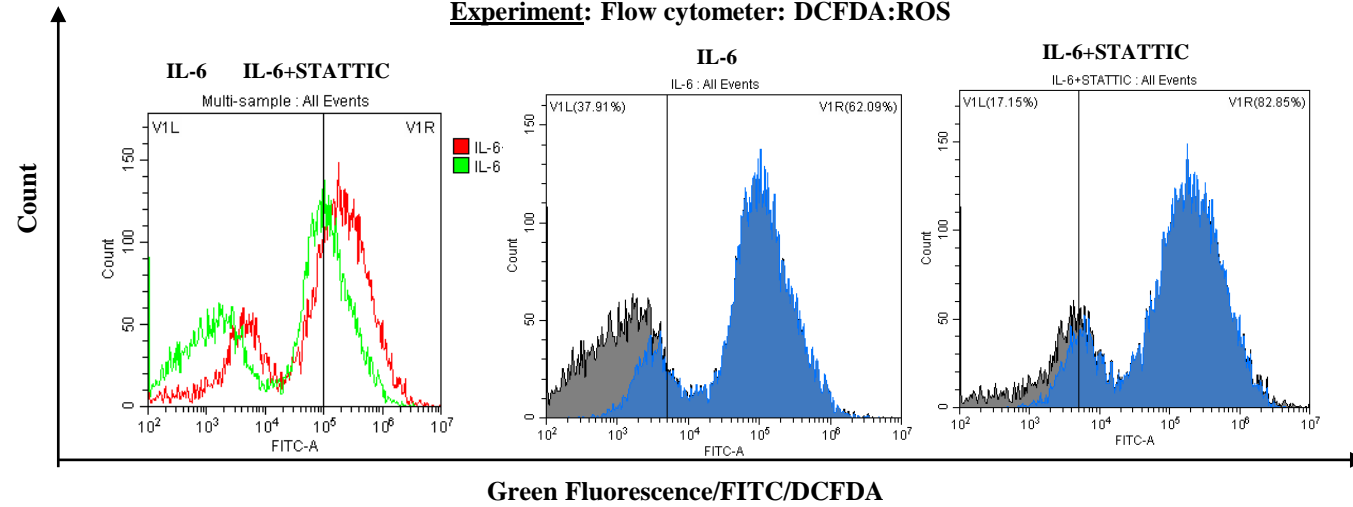

f. Cell: Huh7 Cytokine: IL-6 and STATTIC Time point: 24 hours

Experiment: DCFDA:ROS

|               | A           |           |           |          | B         |           |           |          |
|---------------|-------------|-----------|-----------|----------|-----------|-----------|-----------|----------|
|               | Without NAC |           |           |          | With NAC  |           |           |          |
|               | A:Y1        | A:Y2      | A:Y3      | A:Y4     | B:Y1      | B:Y2      | B:Y3      | B:Y4     |
| 1 Control     | 1.000000    | 1.000000  | 1.000000  | 1.000000 | 0.768036  | 0.657340  | 0.703623  | 0.848945 |
| 2 2uM Stattic | 3.497688    | 1.426858  | 1.476078  | 0.787173 | 2.170717  | 2.955885  | 1.701640  | 0.802135 |
| 3 4uM Stattic | 62.401850   | 63.371990 | 66.608290 |          | 42.086380 | 59.034630 | 47.046880 |          |

F. Cell: Huh7 Cytokine: IL-6 and STATTIC Time point: 24 hours

Experiment: MTT Assay

|               | A           |            |            |            | B          |            |            |            |
|---------------|-------------|------------|------------|------------|------------|------------|------------|------------|
|               | Without NAC |            |            |            | With NAC   |            |            |            |
|               | A:Y1        | A:Y2       | A:Y3       | A:Y4       | B:Y1       | B:Y2       | B:Y3       | B:Y4       |
| 1 Control     | 100.000000  | 100.000000 | 100.000000 | 100.000000 | 100.000000 | 100.000000 | 100.000000 | 100.000000 |
| 2 2uM Stattic | 28.299120   | 63.296700  | 60.173160  | 63.562280  | 114.000000 | 99.014240  | 98.641000  | 130.662000 |
| 3 4uM Stattic | 1.612903    | 1.538462   | 1.515152   | 1.629802   | 46.941180  | 70.974810  | 83.918460  | 115.679400 |

**Figure4****b. Cell: Huh7 Cytokine: IL-6 Time point: 4 hours Experiment: Immunofluorescence Total p65(CST)****Control****IL-6**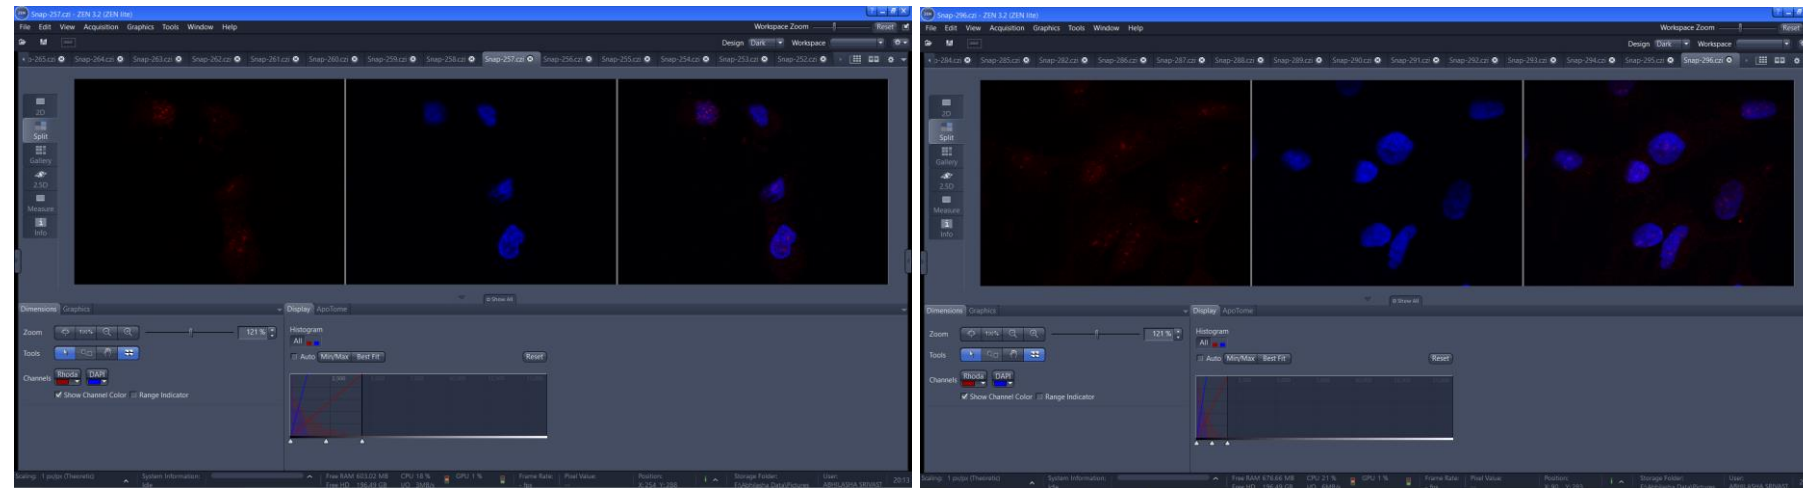**a. Cell: Huh7 Cytokine: Untreated and IL-6 Time point: 72 hours Experiment: Western Blotting ph-p65 and Total p65(CST),  $\beta$ -Actin( Biobharati)****Control IL-6****Ph-p65**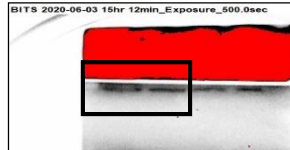**Total-p65**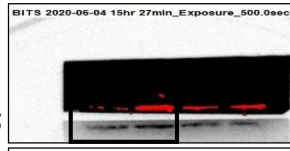 **$\beta$ -Actin**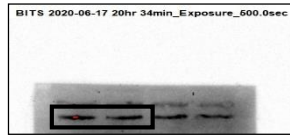**. Cell: Huh7 Cytokine: IL-6 and p65SiRNA Time point: 72hours****Experiment: Flow cytometerAnnexin-PI**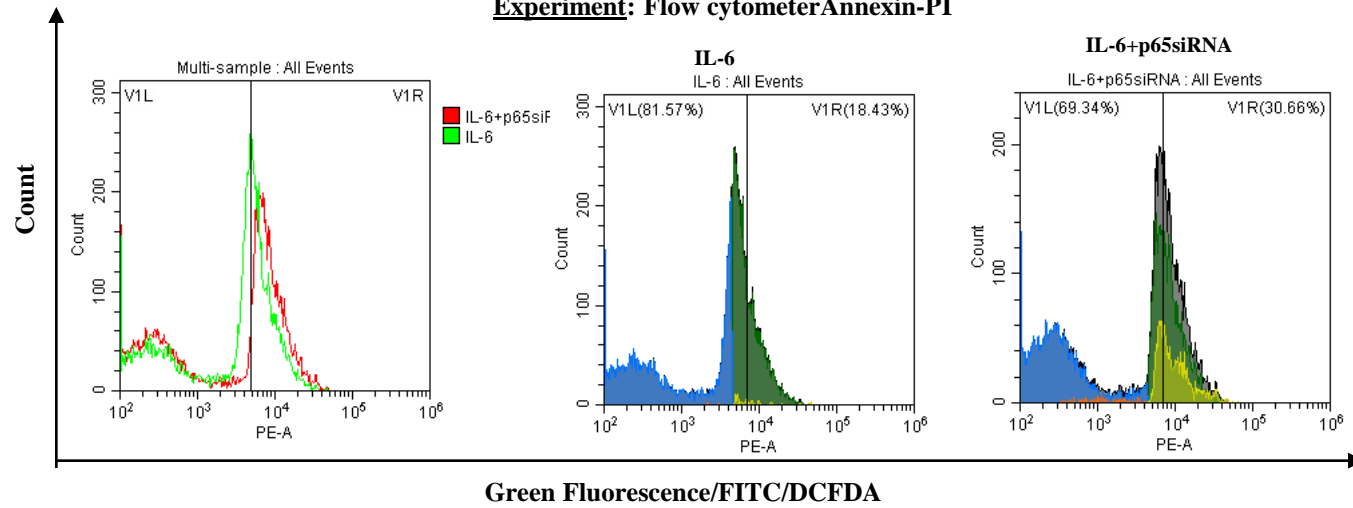**e. Cell: Huh7 Cytokine: IL-6 and p65siRNA Time point: 72 hours Experiment: Western Blotting PCNA(CST),  $\beta$ -Actin( Biobharati)**

|                |   |   |   |   |
|----------------|---|---|---|---|
| IL-6           | - | + | + | - |
| NFkB-p65-siRNA | - | - | + | + |

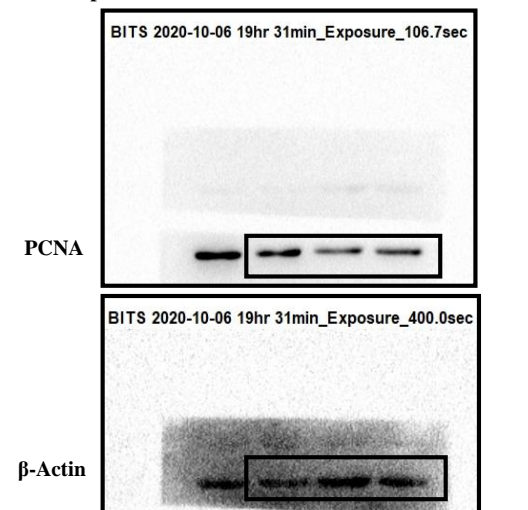**Continued on the next slide****c. Cell: Huh7 Cytokine: IL-6 and p65siRNA Time point: 72 hours Experiment: Western Blotting ph-p65 and Total p65(CST),  $\beta$ -Actin( Biobharati)**

|                |   |   |   |   |
|----------------|---|---|---|---|
| IL-6           | - | + | + | - |
| NFkB-p65-siRNA | - | - | + | + |

**ph-p65**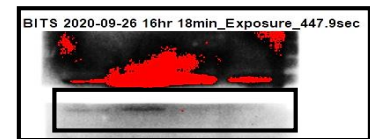**Total-p65**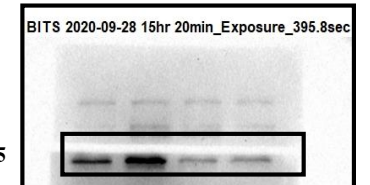 **$\beta$ -Actin**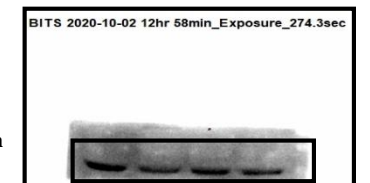

f(i). Cell: Huh7 Cytokine: IL-6 and p65siRNA Time point: 72 hours  
Experiment: Western Blotting ph-STAT3, Total STAT3(CST),  $\beta$ -Actin( Biobharati)

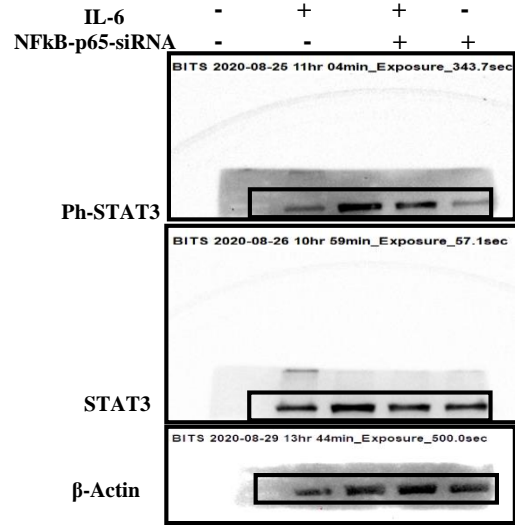

f(ii). Cell: Huh7 Cytokine: IL-6 and STAT3IC Time point: 24 hours  
Experiment: Western Blotting ph-STAT3, Total STAT3(CST), Total p65 (CST), PCNA (CST)  $\beta$ -Actin( Biobharati)

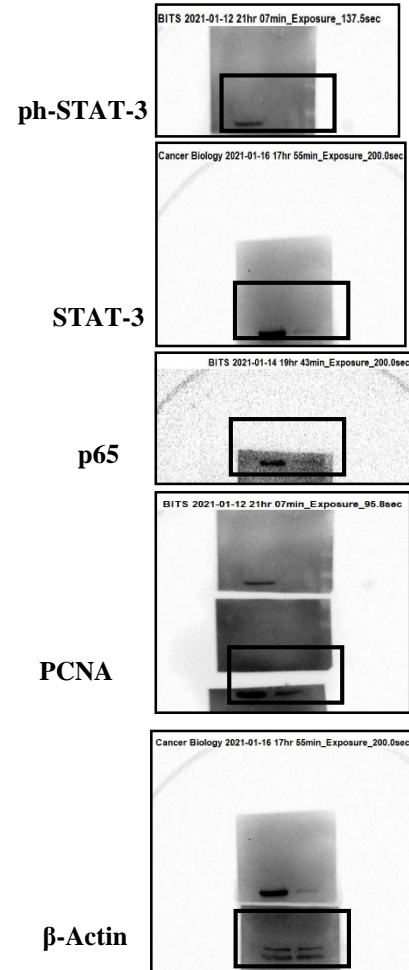

g. Cell: Huh7 Cytokine: IL-6 Time point: 72 hours  
Experiment: Western Blotting Total STAT3(CST), Total p65 (CST)

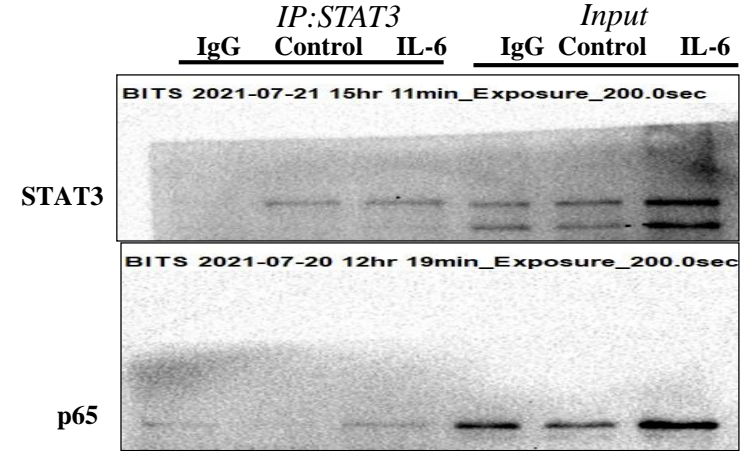



b. Cell: Huh7 Cytokine: TGF-β Time point: 72 hours

Experiment: RT-PCR:N-Cad

|   | A       | B        |
|---|---------|----------|
|   | Control | TGF      |
|   | Y       | Y        |
| 1 | 1       | 3.668016 |
| 2 | 1       | 3.771138 |
| 3 | 1       |          |
| 4 | 1       | 1.652901 |
| 5 | 1       | 2.370186 |

b. Cell: Huh7 Cytokine: TGF-β Time point: 72 hours

Experiment: RT-PCR:Vimentin

|   | A       | B        |
|---|---------|----------|
|   | Control | TGF      |
|   | Y       | Y        |
| 1 | 1       | 3.518596 |
| 2 | 1       | 1.057018 |
| 3 | 1       | 1.827663 |

c. Cell: Huh7 Cytokine: TGF-β Time point: 72 hours

Experiment: Western Blotting: N-Cad, Vimentin(CST) β-

Actin( Biobharati)  
Control TGF-β

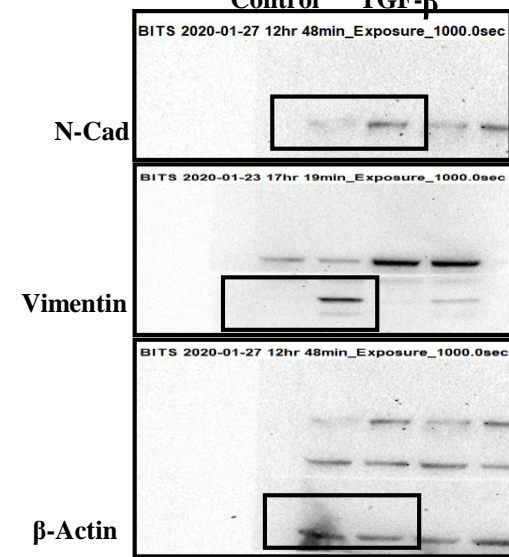

d. Cell: Huh7 Cytokine: TGF-β Time point: 72 hours

Experiment: Western Blotting: Smad2/3 complex(CST) β-Actin( Biobharati)

Control TGF-β

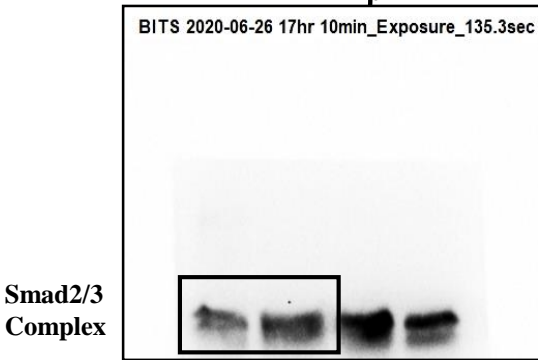

d. Cell: Huh7 Cytokine: TGF-β Time point: 4 hours

Experiment: Immunofluorescence: Smad2

|    | Group A | Group B  |
|----|---------|----------|
|    | Control | TGF      |
| 1  | 1       | 4.223708 |
| 2  | 1       | 5.535046 |
| 3  | 1       | 3.194241 |
| 4  | 1       | 1.480861 |
| 5  | 1       | 1.684239 |
| 6  | 1       | 3.743441 |
| 7  | 1       | 2.156761 |
| 8  | 1       | 5.232372 |
| 9  | 1       | 2.657021 |
| 10 | 1       | 1.649624 |
| 11 | 1       | 2.462889 |
| 12 | 1       | 4.847771 |
| 13 | 1       | 2.095157 |
| 14 | 1       | 1.237235 |
| 15 | 1       | 3.253985 |
| 16 | 1       | 2.806858 |
| 17 | 1       | 2.795482 |
| 18 | 1       | 2.066888 |
| 19 | 1       | 1.981937 |
| 20 | 1       | 2.952034 |
| 21 | 1       | 5.762712 |
| 22 | 1       | 7.514896 |
| 23 | 1       | 3.098539 |
| 24 | 1       | 4.893908 |
| 25 | 1       | 2.786067 |
| 26 | 1       | 2.645927 |
| 27 | 1       | 2.064920 |
| 28 | 1       | 2.738991 |
| 29 | 1       | 5.841393 |
| 30 | 1       | 2.788859 |
| 31 | 1       | 5.673574 |
| 32 | 1       | 3.145868 |
| 33 | 1       | 2.682249 |
| 34 | 1       | 2.588275 |
| 35 | 1       | 5.406887 |

Cell: Huh7 Cytokine: TGF-β Time point: 4 hours Experiment: Immunofluorescence Total SMAD2 (CST)

Control

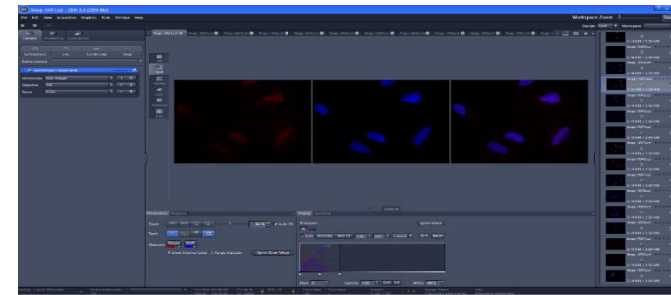

TGF-β

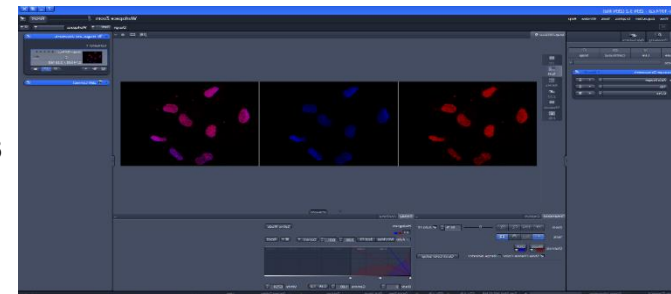

e. Cell: Huh7 Cytokine: TGF- $\beta$  Time point: 72 hours

Experiment: Western Blotting: N-Cad, Total Smad3(CST)  $\beta$ -Actin( Biobharati)

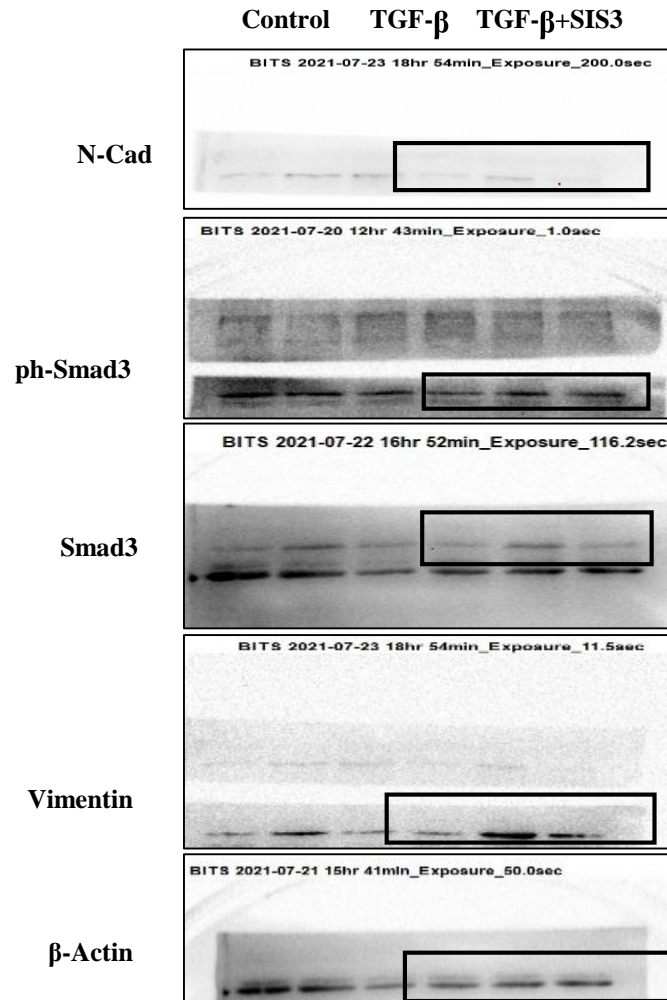

f. Cell: Huh7 Cytokine: TGF- $\beta$  Time point: 72 hours

Experiment: Western Blotting: N-Cad, Total Smad3(CST)  $\beta$ -Actin( Biobharati)

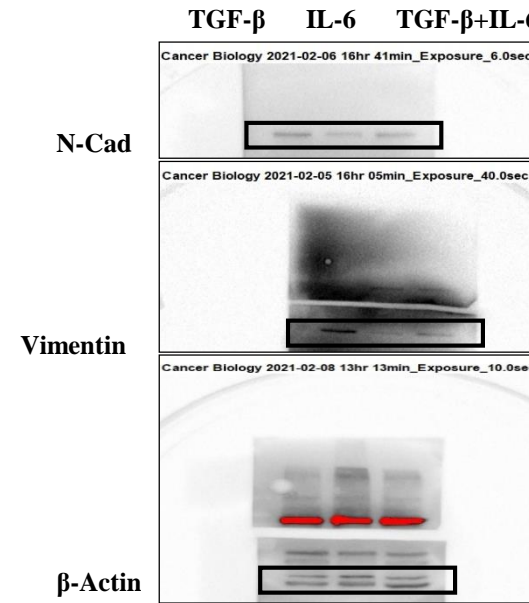

Figure6

b. Cell: Huh7 Cytokine: TGF- $\beta$  Time point: 72 hours Experiment: MTT assay

|   | A       | B         |
|---|---------|-----------|
|   | Control | TGF       |
|   | Y       | Y         |
| 1 | 100     | 38.888890 |
| 2 | 100     | 29.924240 |
| 3 | 100     | 24.820140 |
| 4 | 100     | 71.180560 |

b. Cell: Huh7 Cytokine: IL-6 and TGF- $\beta$  Time point: 72 hours Experiment: MTT assay

|   | Group A  | Group B  | Group C  |
|---|----------|----------|----------|
|   | IL-6     | TGF-     | IL+TGF   |
| 1 | 100.0000 | 28.22580 | 30.64515 |
| 2 | 100.0000 | 25.48388 | 30.96776 |
| 3 | 100.0000 | 19.45137 | 46.79605 |
| 4 | 100.0000 | 63.46748 | 39.62847 |

c. Cell: Huh7 Cytokine: IL-6 and TGF- $\beta$  Time point: 72 hours Experiment: Cell cycle assay

| Table format:<br>Grouped |          | A            |      |       |       | B        |       |       |       | C       |       |       |       | D        |      |      |      |
|--------------------------|----------|--------------|------|-------|-------|----------|-------|-------|-------|---------|-------|-------|-------|----------|------|------|------|
|                          |          | Sub G1-Phase |      |       |       | G1-Phase |       |       |       | S-Phase |       |       |       | G2-Phase |      |      |      |
|                          | x        | A:Y1         | A:Y2 | A:Y3  | A:Y4  | B:Y1     | B:Y2  | B:Y3  | B:Y4  | C:Y1    | C:Y2  | C:Y3  | C:Y4  | D:Y1     | D:Y2 | D:Y3 | D:Y4 |
| 1                        | Control  | 0.44         | 1.09 | 4.21  | 8.71  | 13.05    | 22.88 | 29.88 | 34.67 | 73.51   | 62.92 | 55.69 | 47.25 | 6.28     | 5.38 | 2.83 | 2.68 |
| 2                        | IL-6     | 1.76         | 7.80 | 20.57 | 29.82 | 42.90    | 52.42 | 44.13 | 39.55 | 41.96   | 30.49 | 26.55 | 21.81 | 2.42     | 1.52 | 1.45 | 1.09 |
| 3                        | TGF      | 1.04         | 3.14 | 7.77  | 10.91 | 22.74    | 31.64 | 33.93 | 37.70 | 64.73   | 54.15 | 47.16 | 39.74 | 3.76     | 2.89 | 1.64 | 1.87 |
| 4                        | TGF+IL-6 | 3.15         | 8.86 | 18.78 | 27.49 | 45.34    | 52.18 | 48.46 | 42.00 | 37.55   | 27.54 | 23.64 | 22.42 | 2.08     | 1.30 | 1.01 | 0.77 |

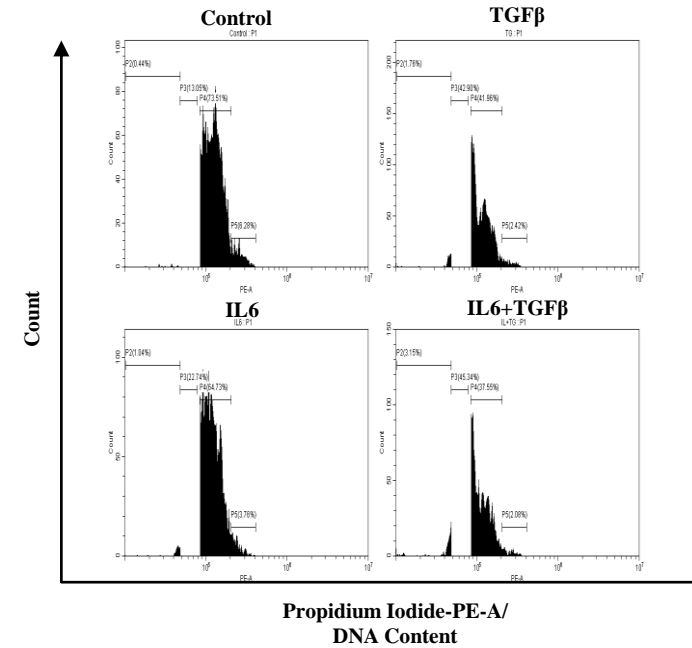

d. Cell: Huh7 Cytokine: IL-6 and TGF- $\beta$  Time point: 72 hours Experiment: RT-PCR: Ki67

|   | A       | B    | C     | D        |
|---|---------|------|-------|----------|
|   | Control | TGF  | IL-6  | TGF+IL-6 |
|   | Y       | Y    | Y     | Y        |
| 1 | 1.00    | 4.29 |       | 1.46     |
| 2 | 1.00    | 3.79 | 52.95 | 1.49     |
| 3 | 1.00    | 3.45 | 38.97 | 1.93     |
| 4 | 1.00    | 3.79 | 52.95 | 1.49     |

d. Cell: Huh7 Cytokine: IL-6 and TGF- $\beta$  Time point: 72 hours Experiment: RT-PCR: PCNA

|   | A       | B    | C      | D        |
|---|---------|------|--------|----------|
|   | Control | TGF  | IL-6   | TGF+IL-6 |
|   | Y       | Y    | Y      | Y        |
| 1 | 1.00    | 2.88 | 224.71 | 0.88     |
| 2 | 1.00    | 3.29 | 376.10 | 0.68     |
| 3 | 1.00    | 2.88 | 224.71 | 0.88     |
| 4 | 1.00    | 3.29 | 376.10 | 0.68     |



Figure7

a. Cell: Huh7 Cytokine: IL-6 and TGF- $\beta$   
Time point: 72 hours Experiment: Western  
Blotting phospho-p65 Total p65(CST),  $\beta$ -  
Actin( Biobharati)

Control TGF- $\beta$  IL6 TGF- $\beta$ +IL6

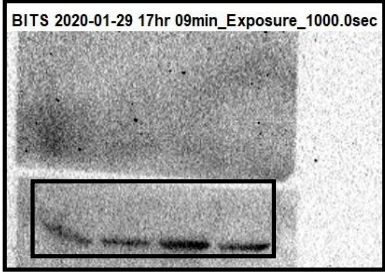

Ph-p65

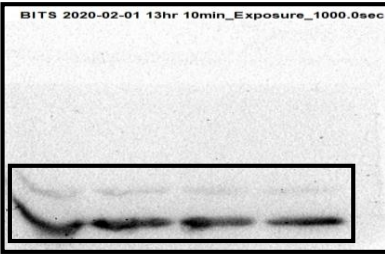

$\beta$ -Actin

b. Cell: Huh7 Cytokine: TGF- $\beta$  and IL-6 Time point: 72 hours Experiment: Immunofluorescence Total  
p65(CST)  
IL-6

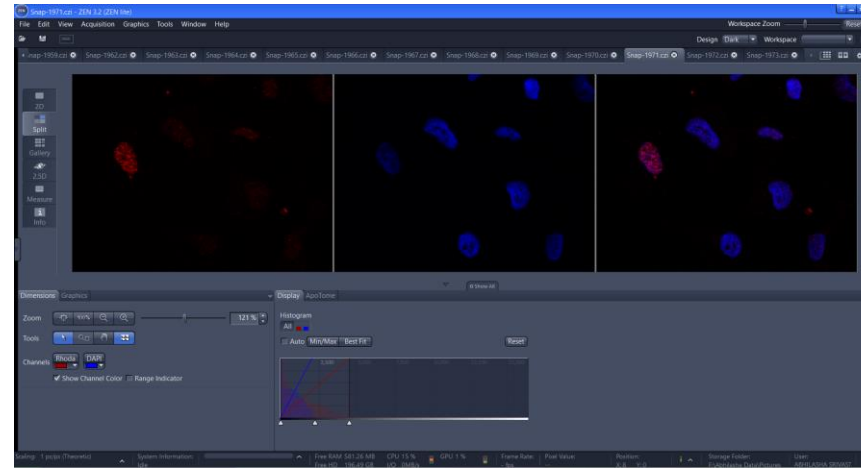

TGF- $\beta$

TGF- $\beta$ +IL-6

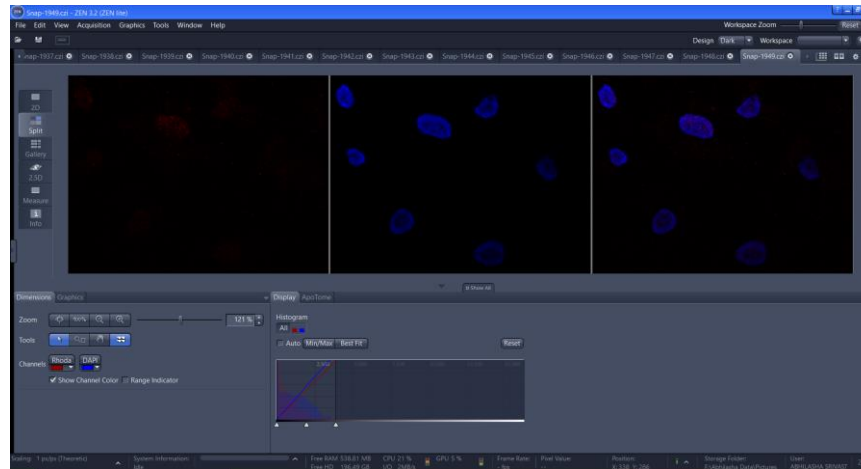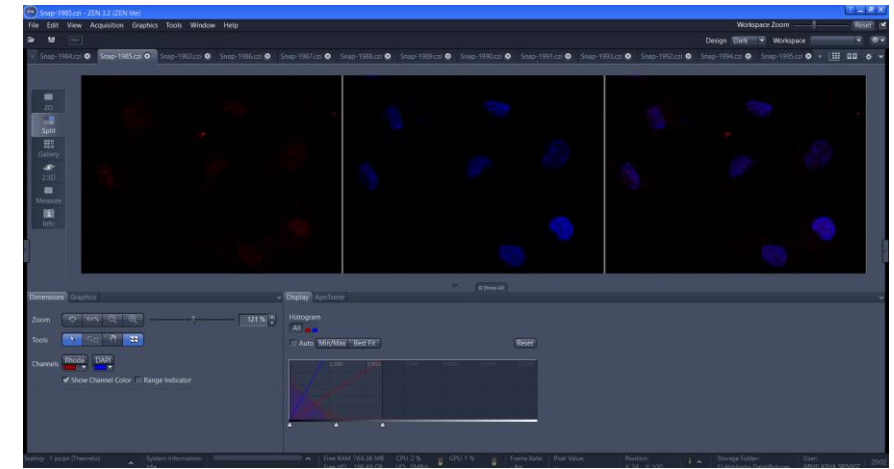

Continued on the next slide

c. Cell: Huh7 Cytokine: IL-6 and TGF- $\beta$  Time point: 72 hours Experiment: RT-PCR: IL-6R

|   | A       | B    | C      | D        |
|---|---------|------|--------|----------|
|   | Control | TGF  | IL-6   | TGF+IL-6 |
|   | Y       | Y    | Y      | Y        |
| 1 | 1.00    | 3.35 | 207.72 | 1.75     |
| 2 | 1.00    | 5.34 | 313.12 | 1.07     |
| 3 | 1.00    | 0.38 | 260.42 | 3.75     |
| 4 | 1.00    | 0.38 |        | 0.43     |

d. Cell: Huh7 Cytokine: IL-6 and TGF- $\beta$  Time point: 72 hours Experiment: Western Blotting :PCNA (CST),  $\beta$ -Actin(Biobharati)

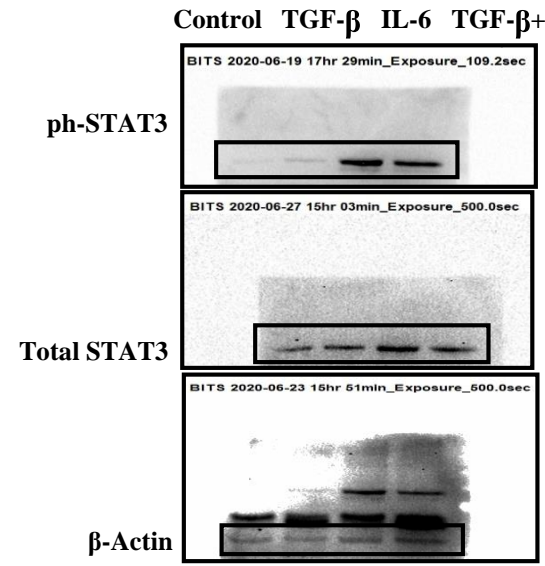

e. Cell: Huh7 Cytokine: IL-6 and TGF- $\beta$  Time point: 72 hours Experiment: Immunofluorescence: STAT3

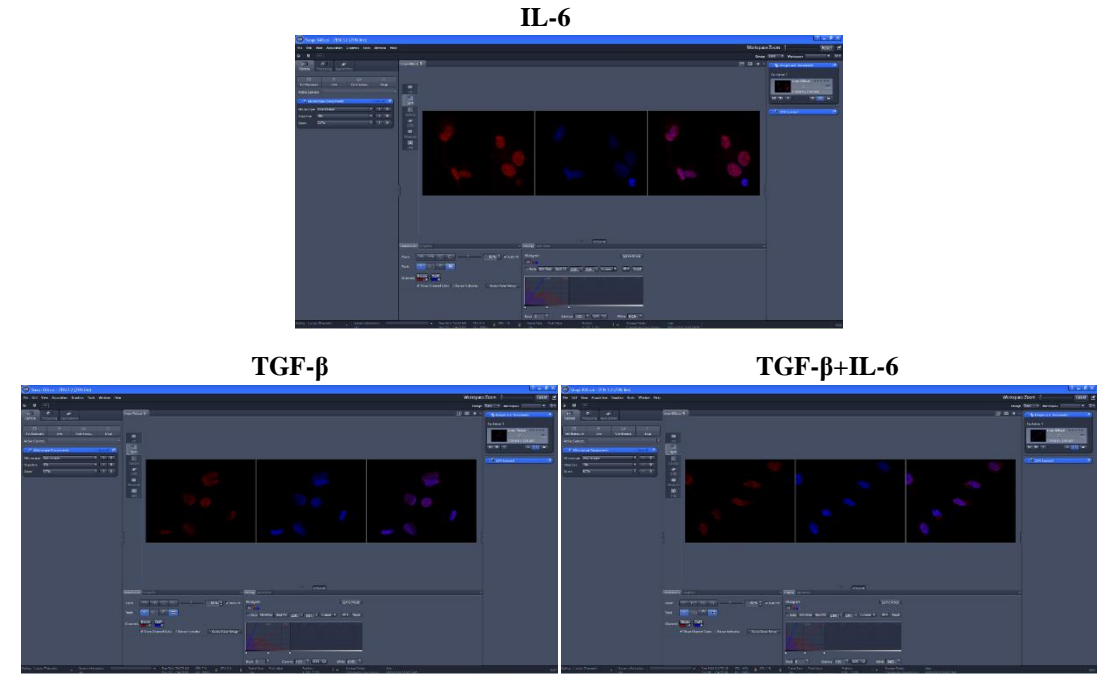

F. Cell: Huh7 Cytokine: IL-6 and TGF- $\beta$  Time point: 72 hours Experiment: Immunofluorescence: Smad2

|   | A       | B        | C        | D        |
|---|---------|----------|----------|----------|
|   | Control | TGF      | IL-6     | TGF+IL-6 |
|   | Y       | Y        | Y        | Y        |
| 1 | 1       | 1.267860 | 1.067980 | 1.638743 |
| 2 | 1       | 0.648463 | 0.597625 | 1.258630 |
| 3 | 1       | 1.321554 | 0.583606 | 1.445862 |
| 4 | 1       | 1.016655 | 1.014766 | 1.067994 |
| 5 | 1       | 2.682135 | 0.881523 | 1.852116 |
| 6 | 1       | 2.394000 | 1.292250 | 2.834750 |
| 7 | 1       | 1.229000 | 1.182000 | 2.561200 |
| 8 | 1       | 2.037125 | 0.648250 | 0.777500 |

F. Cell: Huh7 Cytokine: IL-6 and TGF- $\beta$  Time point: 72 hours Experiment: Western Blotting Smad2/3 Complex(CST),  $\beta$ -Actin(Biobharati)

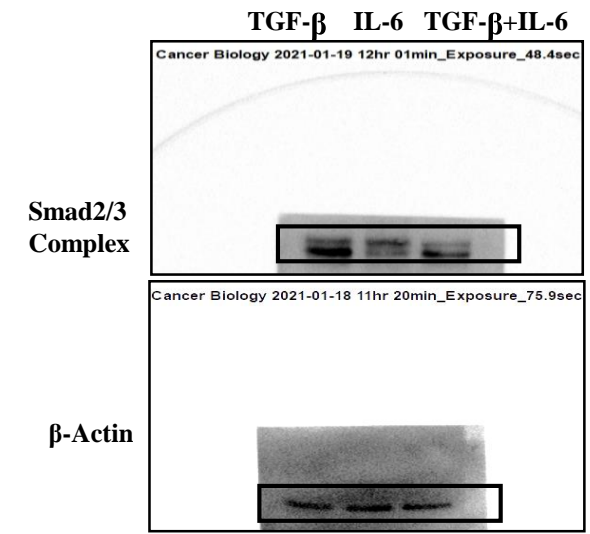

|   | A       | B        | C        | D        |
|---|---------|----------|----------|----------|
|   | Control | TGF      | IL-6     | TGF+IL-6 |
|   | Y       | Y        | Y        | Y        |
| 1 | 1       | 1.975375 | 4.684109 | 2.182634 |
| 2 | 1       | 1.880175 | 3.353578 | 1.370030 |
| 3 | 1       | 4.657330 | 7.217819 | 2.015197 |
| 4 | 1       | 0.856154 | 6.118980 | 1.293359 |
| 5 | 1       | 0.931759 | 5.343215 | 1.764860 |
| 6 | 1       | 0.981600 | 6.940600 | 4.438000 |
| 7 | 1       | 0.781250 | 4.486094 | 3.281250 |

f. Cell: Huh7 Cytokine: TGF- $\beta$  and IL-6 Time point: 4 hours Experiment: Immunofluorescence Total SMAD2 (CST)

TGF- $\beta$

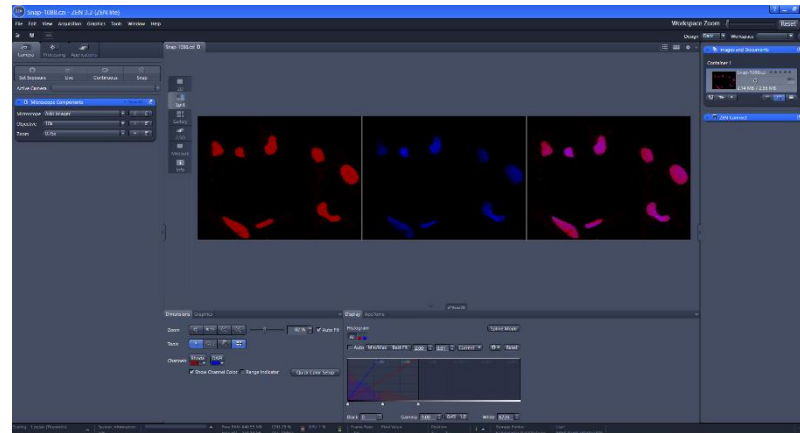

IL-6

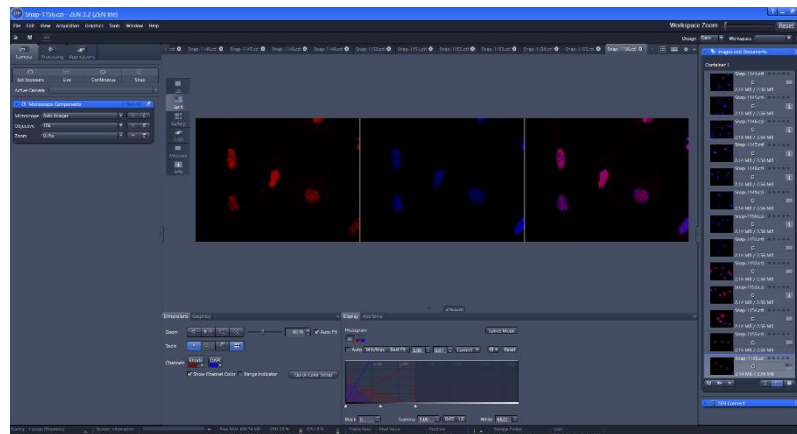

TGF- $\beta$ +IL-6

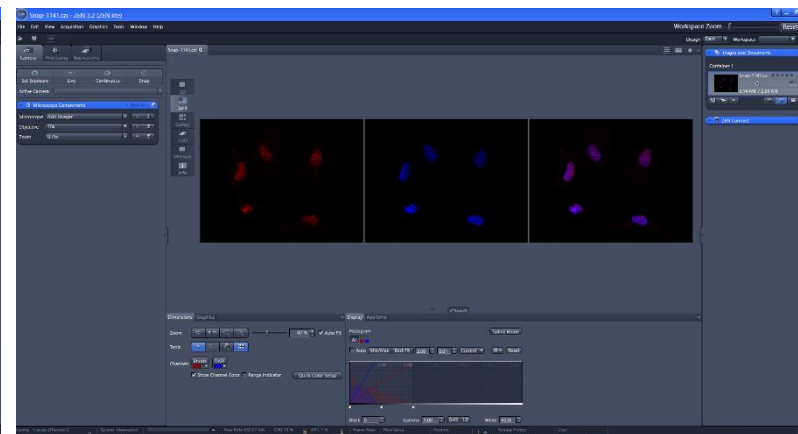

Figure 8

a. Cell: Huh7 Cytokine: IL-6 Time point: 72 hours Experiment: Western Blotting H3K4me3(CST),  $\beta$ -Actin( Biobharati)

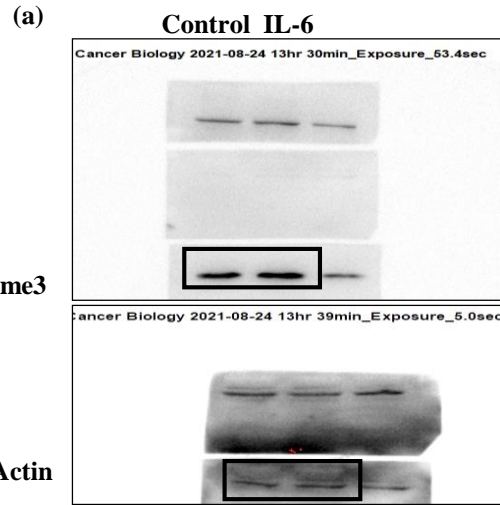

a. Cell: Huh7 Cytokine: IL-6 Time point: 72 hours Experiment: Western Blotting H3K27me3(CST),  $\beta$ -Actin( Biobharati)

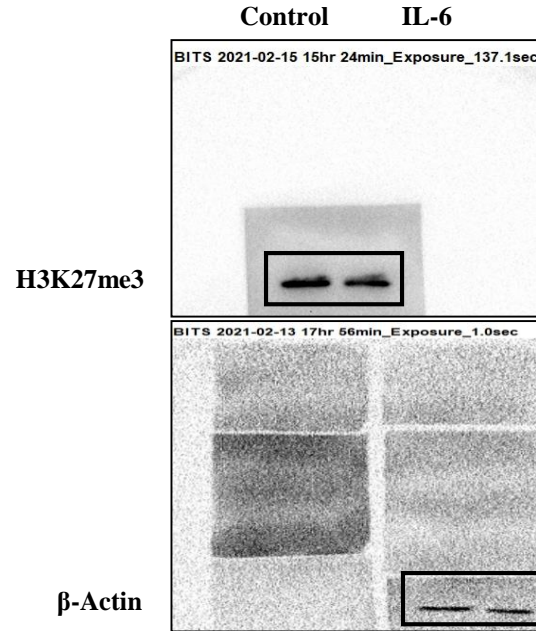

b. Cell: Huh7 Cytokine: IL-6 Time point: 72 hours Experiment: Western Blotting H3K4me3(CST),  $\beta$ -Actin( Biobharati)

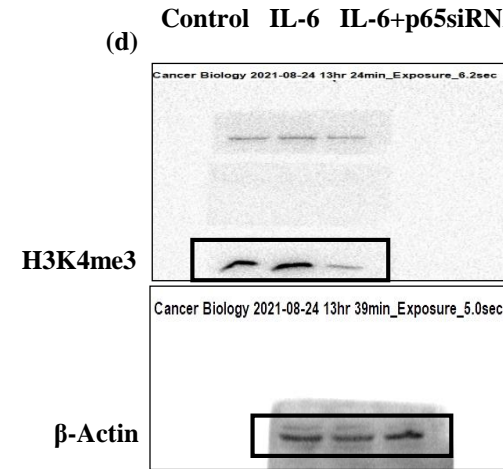

c. Cell: Huh7 Cytokine: TGF- $\beta$  Time point: 72 hours Experiment: Western Blotting H3K27me3(CST),  $\beta$ -Actin( Biobharati)

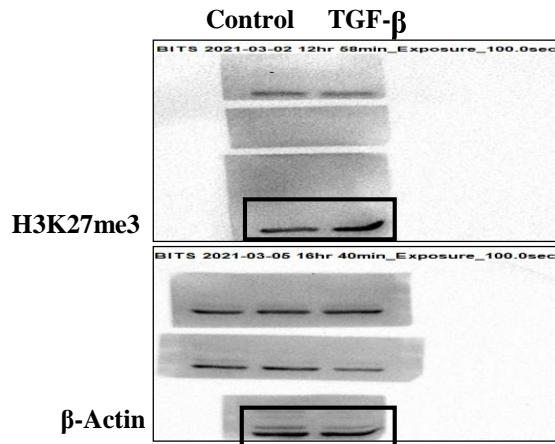

d. Cell: Huh7 Cytokine: IL-6 Time point: 72 hours Experiment: Western Blotting EZH2(CST),  $\beta$ -Actin( Biobharati)

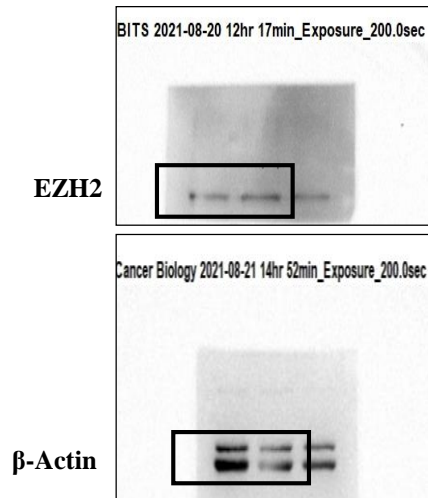

f. Cell: Huh7 Cytokine: TGF- $\beta$  and IL-6 Time point: 4 hours Experiment: Immunofluorescence EZH2 (CST)

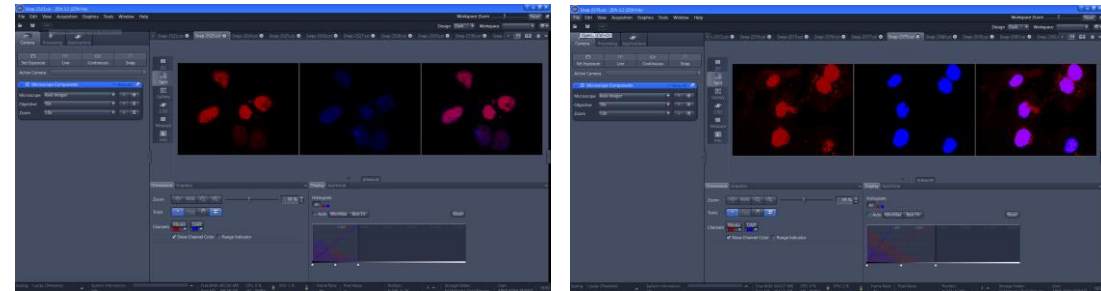

f. Cell: Huh7 Cytokine: IL-6 Time point: 72 hours Experiment: MTT Assay

| Table format:<br>Grouped | Group A   |           |           |           | Group B   |           |           |           |
|--------------------------|-----------|-----------|-----------|-----------|-----------|-----------|-----------|-----------|
|                          | A:1       | A:2       | A:3       | A:4       | B:1       | B:2       | B:3       | B:4       |
| 1 Title                  | 100.00000 | 100.00000 | 100.00000 | 100.00000 | 104.47760 | 113.24200 | 127.52290 | 135.78950 |
| 2 Title                  | 135.82090 | 136.07310 | 138.9908  | 142.6316  | 133.33330 | 123.28770 | 114.67890 | 131.05280 |
| 3 Title                  | 108.45770 | 111.41550 | 119.2661  | 115.2632  | 118.40800 | 111.41550 | 111.92660 | 123.15790 |
| 4 Title                  | 87.06468  | 91.78082  | 101.3761  | 100.00000 | 81.59204  | 78.08219  | 69.72477  | 58.94737  |

# **RT-PCR raw data for IL-6R, gp-130 and B-Actin**



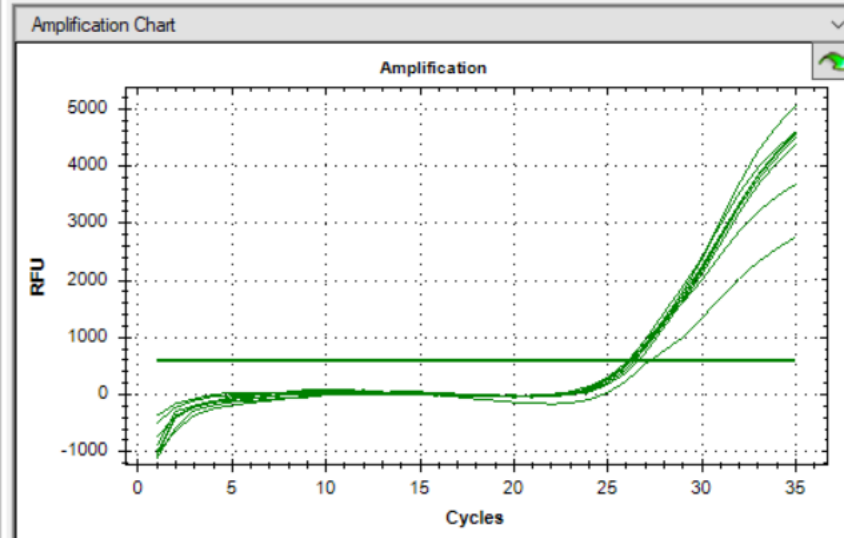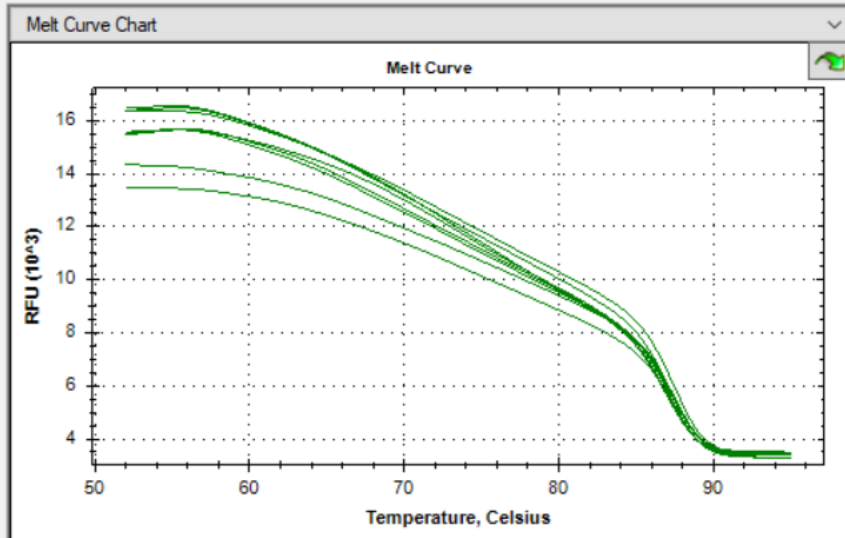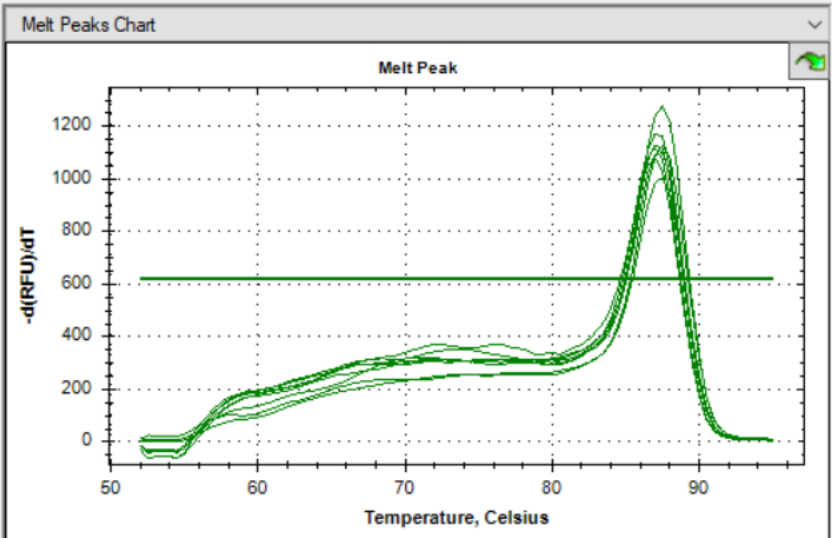

| Well | Fluor | Target | Content | Sample  | Cq    |
|------|-------|--------|---------|---------|-------|
| D01  | SYBR  | IL6R   | Unkn    | Control | 26.29 |
| D02  | SYBR  | IL6R   | Unkn    | TG      | 26.45 |
| D03  | SYBR  | IL6R   | Unkn    | IL      | 26.28 |
| D04  | SYBR  | IL6R   | Unkn    | IL+TG   | 26.63 |
| D05  | SYBR  | IL6R   | Unkn    | Control | 26.40 |
| D06  | SYBR  | IL6R   | Unkn    | TG      | 26.19 |
| D07  | SYBR  | IL6R   | Unkn    | IL      | 26.11 |
| D08  | SYBR  | IL6R   | Unkn    | IL+TG   | 27.31 |

| Well | Fluor | Target | Content | Sample  | Melt Temp |
|------|-------|--------|---------|---------|-----------|
| D01  | SYBR  | IL6R   | Unkn    | Control | 87.50     |
| D02  | SYBR  | IL6R   | Unkn    | TG      | 87.00     |
| D03  | SYBR  | IL6R   | Unkn    | IL      | 87.00     |
| D04  | SYBR  | IL6R   | Unkn    | IL+TG   | 87.00     |
| D05  | SYBR  | IL6R   | Unkn    | Control | 87.00     |
| D06  | SYBR  | IL6R   | Unkn    | TG      | 87.50     |
| D07  | SYBR  | IL6R   | Unkn    | IL      | 87.50     |
| D08  | SYBR  | IL6R   | Unkn    | IL+TG   | 87.50     |

|   | 1   | 2   | 3   | 4   | 5   | 6   | 7   | 8   | 9 | 10 | 11 | 12 |
|---|-----|-----|-----|-----|-----|-----|-----|-----|---|----|----|----|
| A | Unk | Unk | Unk | Unk | Unk | Unk | Unk | Unk |   |    |    |    |
| B | Unk | Unk | Unk | Unk | Unk | Unk | Unk | Unk |   |    |    |    |
| C | Unk | Unk | Unk | Unk | Unk | Unk | Unk | Unk |   |    |    |    |
| D | Unk | Unk | Unk | Unk | Unk | Unk | Unk | Unk |   |    |    |    |
| E | Unk | Unk | Unk | Unk | Unk | Unk | Unk | Unk |   |    |    |    |
| F | Unk | Unk | Unk | Unk | Unk | Unk | Unk | Unk |   |    |    |    |
| G | Unk | Unk | Unk | Unk | Unk | Unk | Unk | Unk |   |    |    |    |
| H | Unk | Unk | Unk | Unk | Unk | Unk | Unk | Unk |   |    |    |    |



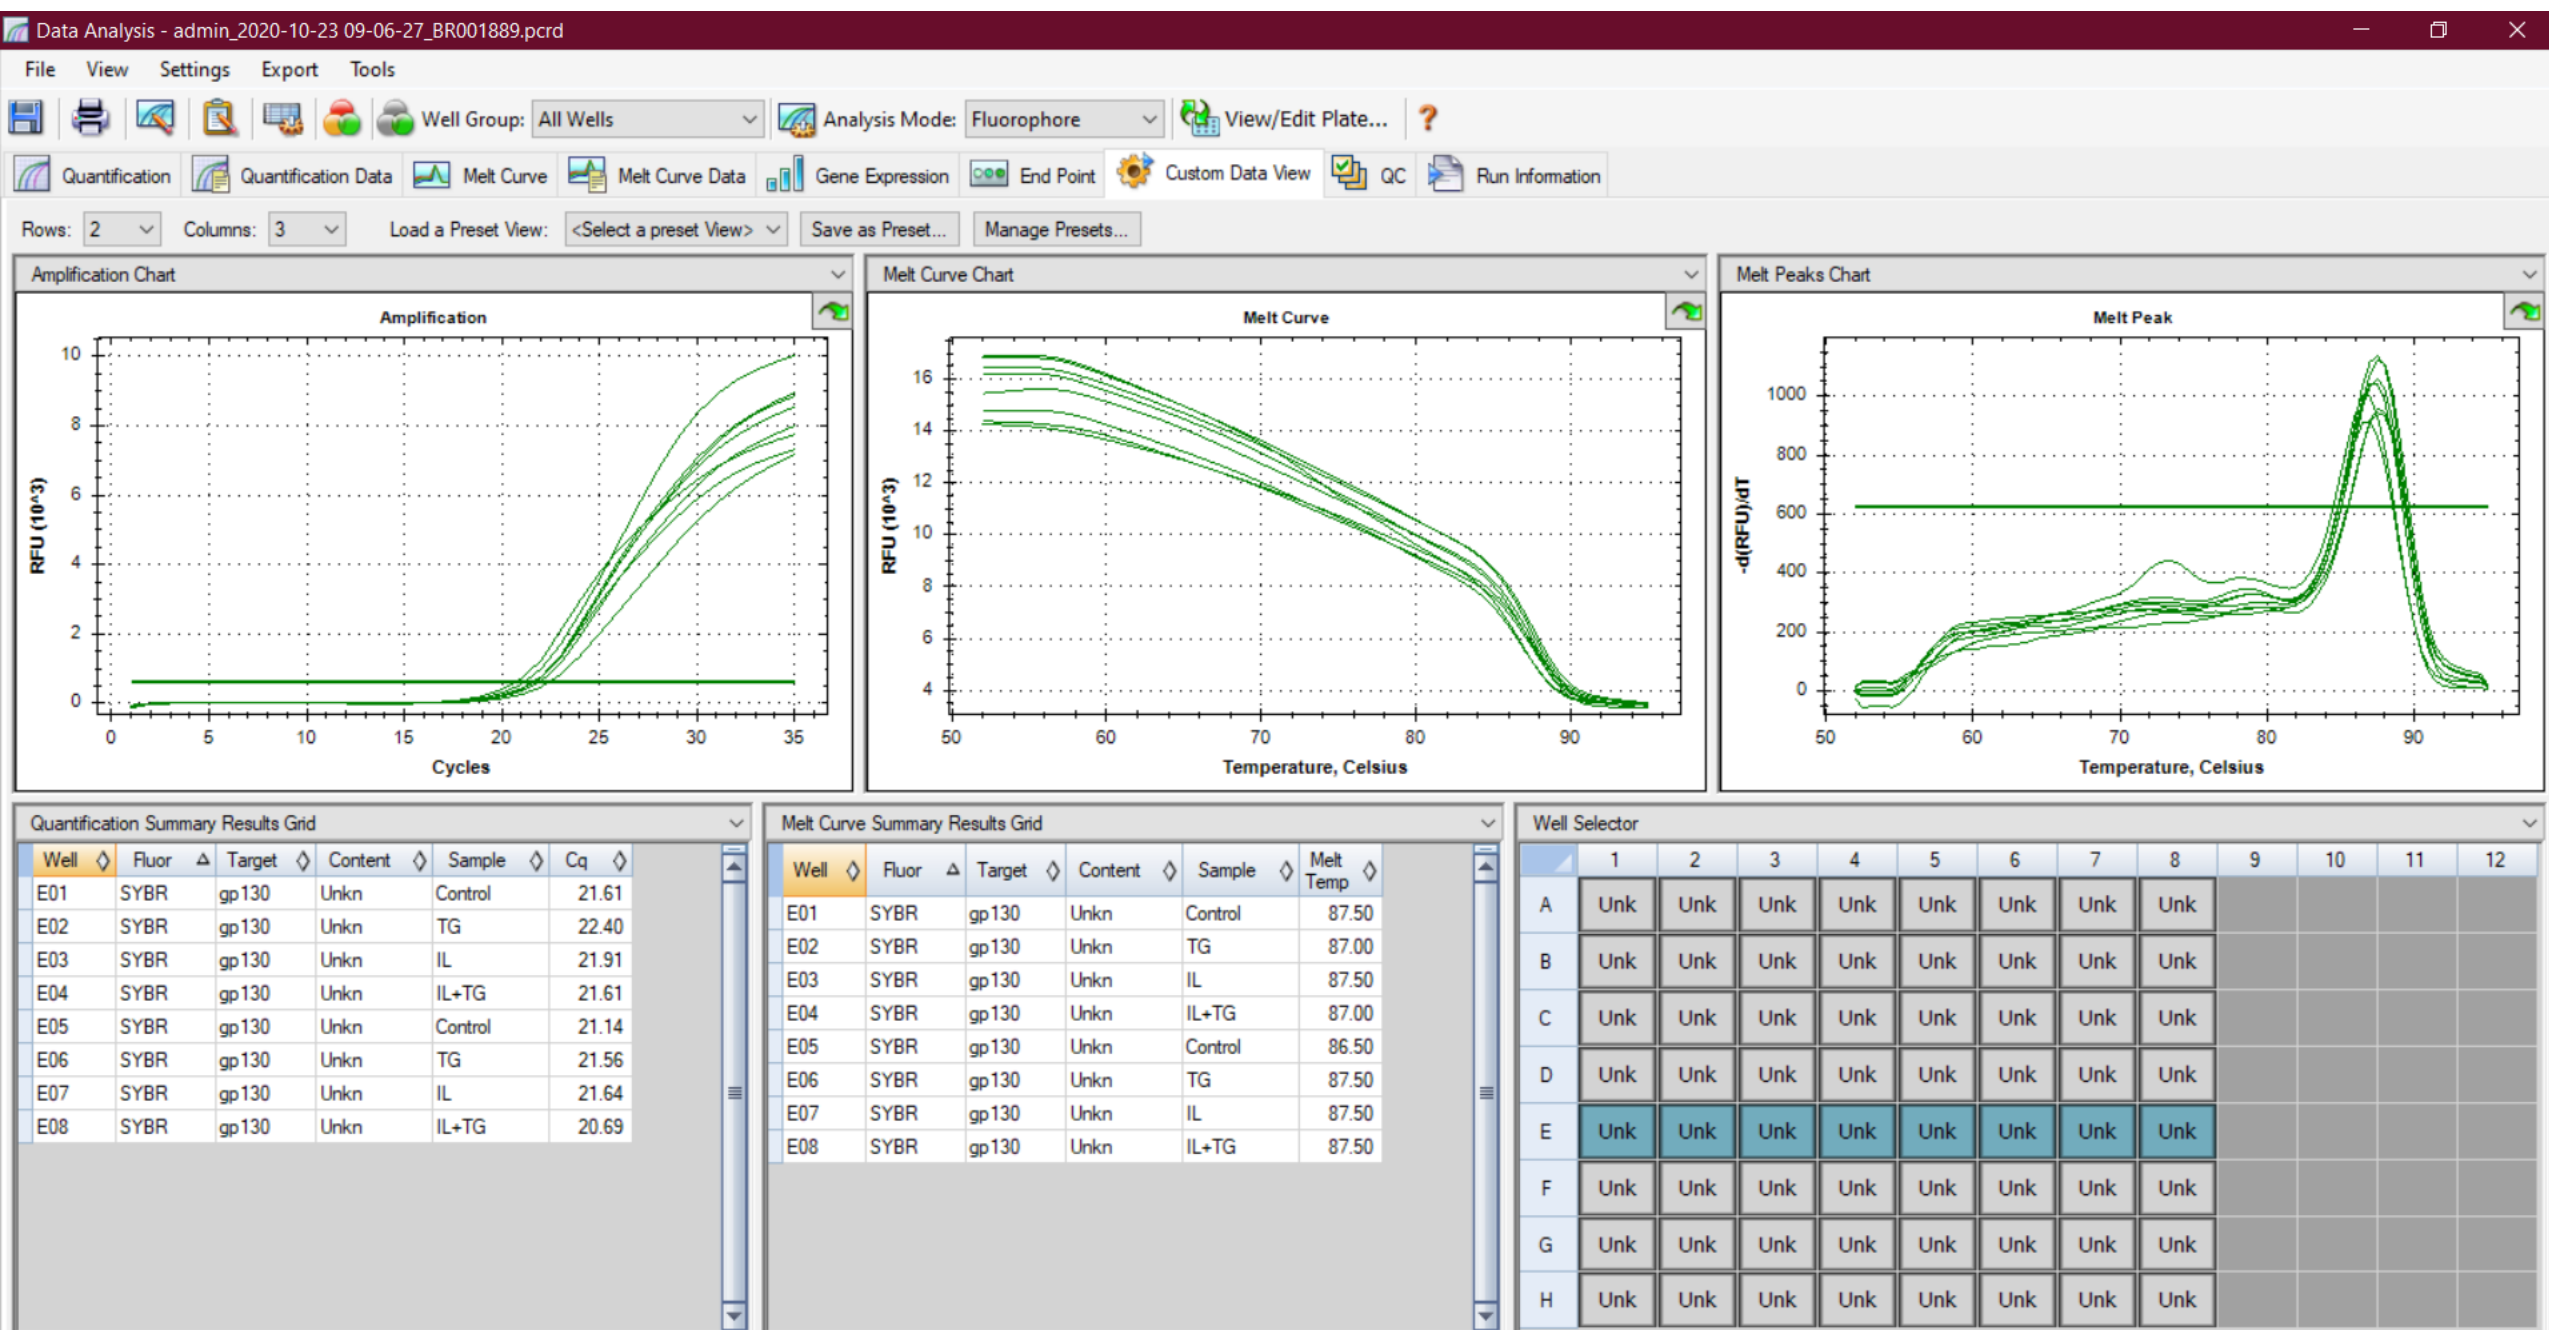

File View Settings Export Tools

Well Group: All Wells Analysis Mode: Fluorophore View/Edit Plate... ?

Quantification Quantification Data Melt Curve Melt Curve Data Gene Expression End Point Custom Data View QC Run Information

Rows: 2 Columns: 3 Load a Preset View: <Select a preset View> Save as Preset... Manage Presets...

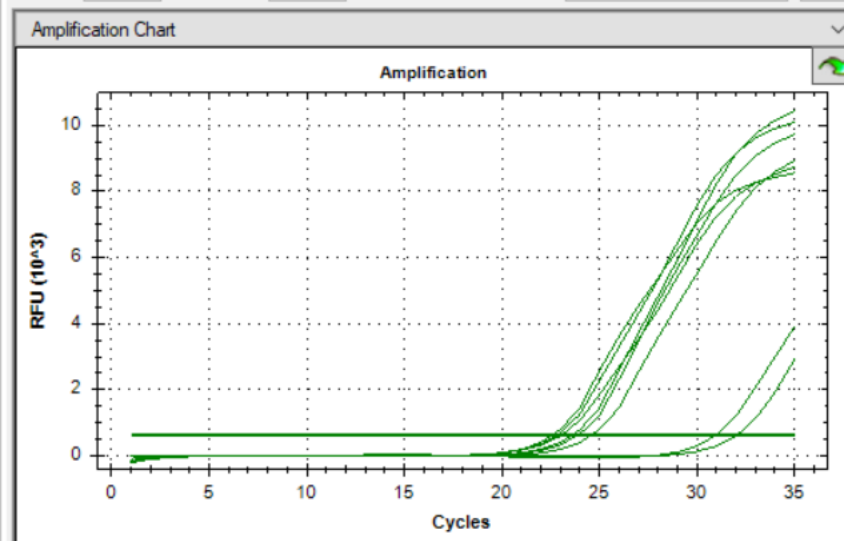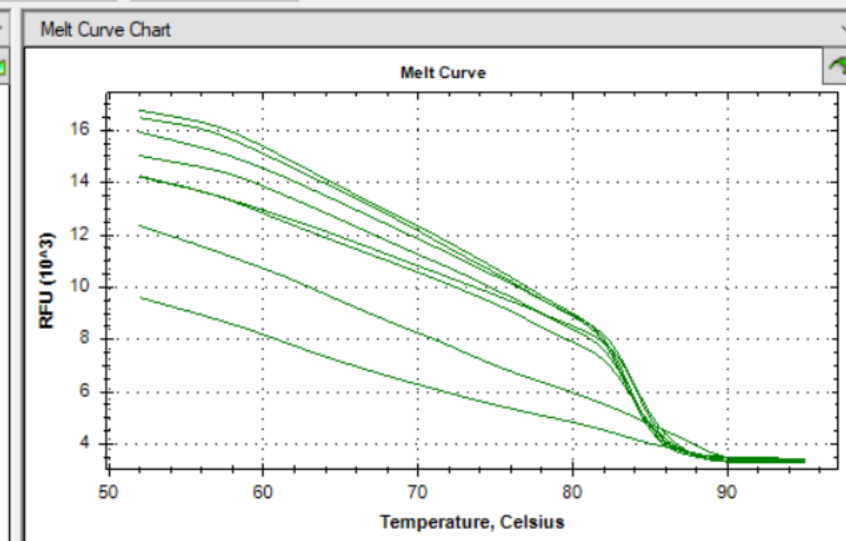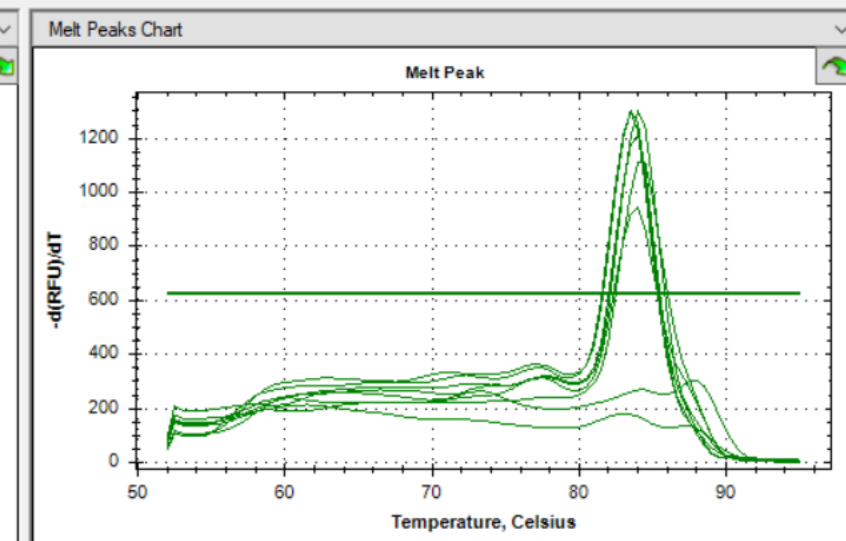

Quantification Summary Results Grid

| Well | Fluor | Target | Content | Sample  | Cq    |
|------|-------|--------|---------|---------|-------|
| H01  | SYBR  | Actin  | Unkn    | Control | 23.02 |
| H02  | SYBR  | Actin  | Unkn    | TG      | 24.52 |
| H03  | SYBR  | Actin  | Unkn    | IL      | 32.02 |
| H04  | SYBR  | Actin  | Unkn    | IL+TG   | 23.53 |
| H05  | SYBR  | Actin  | Unkn    | Control | 22.76 |
| H06  | SYBR  | Actin  | Unkn    | TG      | 23.84 |
| H07  | SYBR  | Actin  | Unkn    | IL      | 30.93 |
| H08  | SYBR  | Actin  | Unkn    | IL+TG   | 22.53 |

Melt Curve Summary Results Grid

| Well | Fluor | Target | Content | Sample  | Melt Temp |
|------|-------|--------|---------|---------|-----------|
| H01  | SYBR  | Actin  | Unkn    | Control | 84.00     |
| H02  | SYBR  | Actin  | Unkn    | TG      | 84.00     |
| H03  | SYBR  | Actin  | Unkn    | IL      | None      |
| H04  | SYBR  | Actin  | Unkn    | IL+TG   | 83.50     |
| H05  | SYBR  | Actin  | Unkn    | Control | 83.50     |
| H06  | SYBR  | Actin  | Unkn    | TG      | 84.00     |
| H07  | SYBR  | Actin  | Unkn    | IL      | None      |
| H08  | SYBR  | Actin  | Unkn    | IL+TG   | 84.00     |

Well Selector

|   | 1   | 2   | 3   | 4   | 5   | 6   | 7   | 8   | 9 | 10 | 11 | 12 |
|---|-----|-----|-----|-----|-----|-----|-----|-----|---|----|----|----|
| A | Unk | Unk | Unk | Unk | Unk | Unk | Unk | Unk |   |    |    |    |
| B | Unk | Unk | Unk | Unk | Unk | Unk | Unk | Unk |   |    |    |    |
| C | Unk | Unk | Unk | Unk | Unk | Unk | Unk | Unk |   |    |    |    |
| D | Unk | Unk | Unk | Unk | Unk | Unk | Unk | Unk |   |    |    |    |
| E | Unk | Unk | Unk | Unk | Unk | Unk | Unk | Unk |   |    |    |    |
| F | Unk | Unk | Unk | Unk | Unk | Unk | Unk | Unk |   |    |    |    |
| G | Unk | Unk | Unk | Unk | Unk | Unk | Unk | Unk |   |    |    |    |
| H | Unk | Unk | Unk | Unk | Unk | Unk | Unk | Unk |   |    |    |    |

## **RT-PCR raw data for Ki67, PCNA and B-Actin**

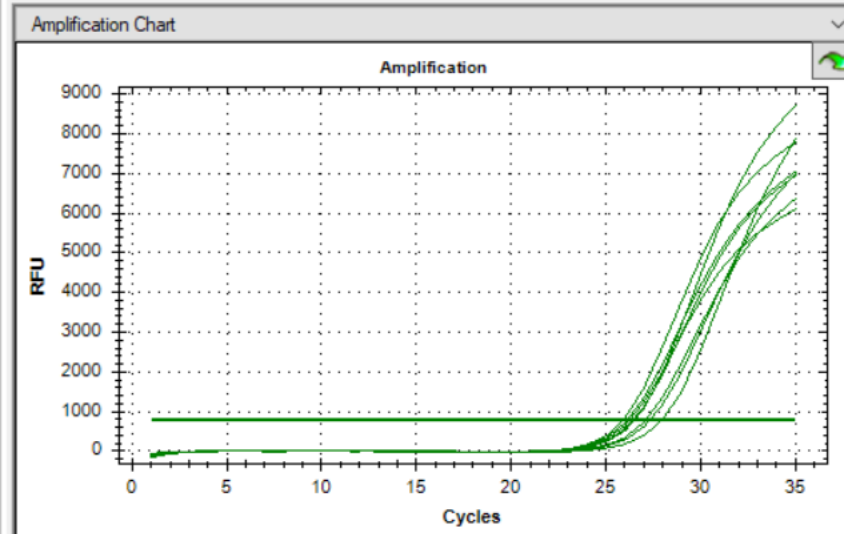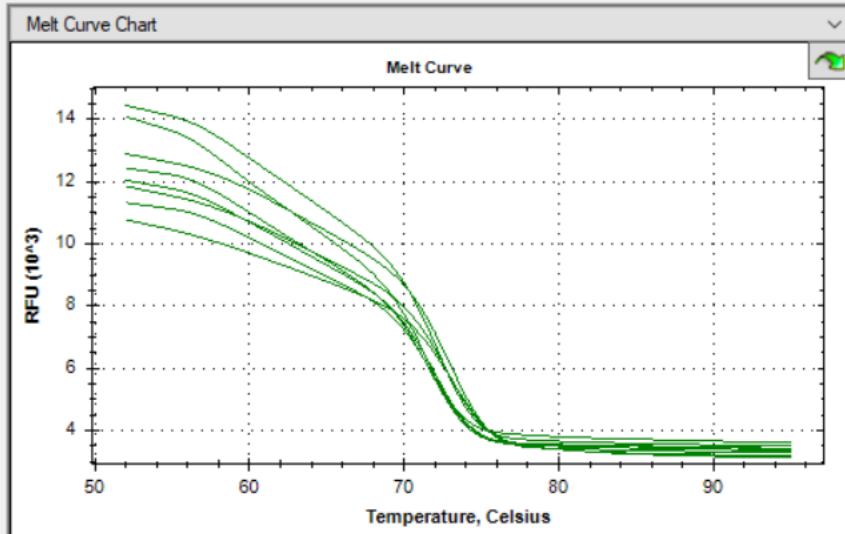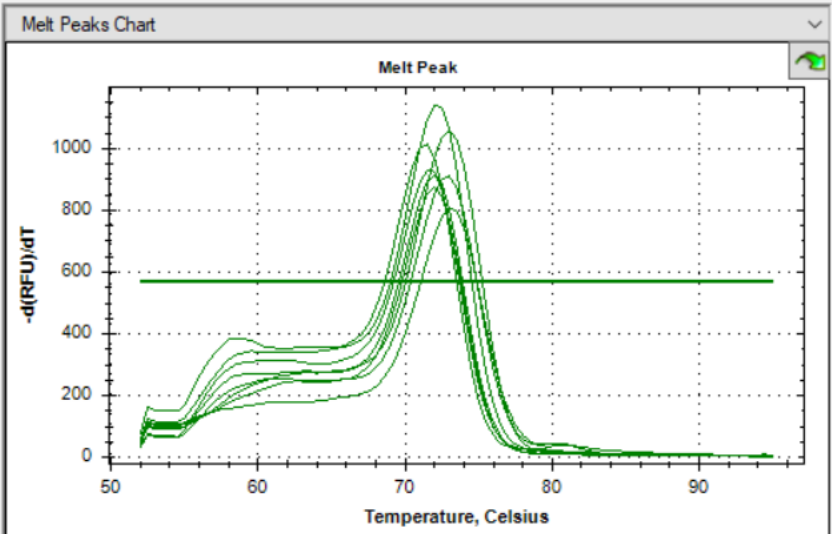

Quantification Summary Results Grid

| Well | Fluor | Target | Content | Sample  | Cq    |
|------|-------|--------|---------|---------|-------|
| F01  | SYBR  | PCNA   | Unkn    | Control | 26.28 |
| F02  | SYBR  | PCNA   | Unkn    | TG      | 26.53 |
| F03  | SYBR  | PCNA   | Unkn    | IL      | 27.13 |
| F04  | SYBR  | PCNA   | Unkn    | IL+TG   | 28.01 |
| F05  | SYBR  | PCNA   | Unkn    | Control | 27.34 |
| F06  | SYBR  | PCNA   | Unkn    | TG      | 26.15 |
| F07  | SYBR  | PCNA   | Unkn    | IL      | 25.95 |
| F08  | SYBR  | PCNA   | Unkn    | IL+TG   | 26.44 |

Melt Curve Summary Results Grid

| Well | Fluor | Target | Content | Sample  | Melt Temp |
|------|-------|--------|---------|---------|-----------|
| F01  | SYBR  | PCNA   | Unkn    | Control | 73.00     |
| F02  | SYBR  | PCNA   | Unkn    | TG      | 72.00     |
| F03  | SYBR  | PCNA   | Unkn    | IL      | 72.00     |
| F04  | SYBR  | PCNA   | Unkn    | IL+TG   | 71.50     |
| F05  | SYBR  | PCNA   | Unkn    | Control | 71.50     |
| F06  | SYBR  | PCNA   | Unkn    | TG      | 72.00     |
| F07  | SYBR  | PCNA   | Unkn    | IL      | 73.00     |
| F08  | SYBR  | PCNA   | Unkn    | IL+TG   | 73.00     |

Well Selector

|   | 1   | 2   | 3   | 4   | 5   | 6   | 7   | 8   | 9 | 10 | 11 | 12 |
|---|-----|-----|-----|-----|-----|-----|-----|-----|---|----|----|----|
| A | Unk | Unk | Unk | Unk | Unk | Unk | Unk | Unk |   |    |    |    |
| B | Unk | Unk | Unk | Unk | Unk | Unk | Unk | Unk |   |    |    |    |
| C | Unk | Unk | Unk | Unk | Unk | Unk | Unk | Unk |   |    |    |    |
| D | Unk | Unk | Unk | Unk | Unk | Unk | Unk | Unk |   |    |    |    |
| E | Unk | Unk | Unk | Unk | Unk | Unk | Unk | Unk |   |    |    |    |
| F | Unk | Unk | Unk | Unk | Unk | Unk | Unk | Unk |   |    |    |    |
| G | Unk | Unk | Unk | Unk | Unk | Unk | Unk | Unk |   |    |    |    |
| H | Unk | Unk | Unk | Unk | Unk | Unk | Unk | Unk |   |    |    |    |

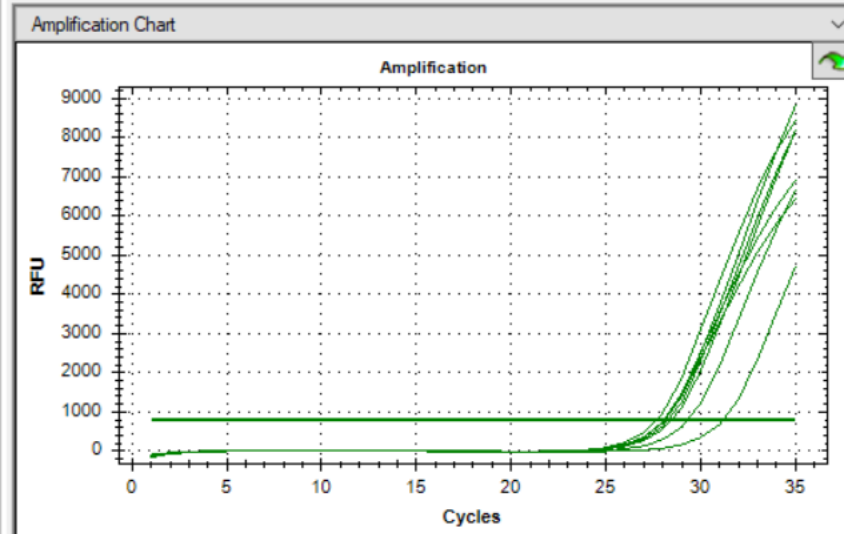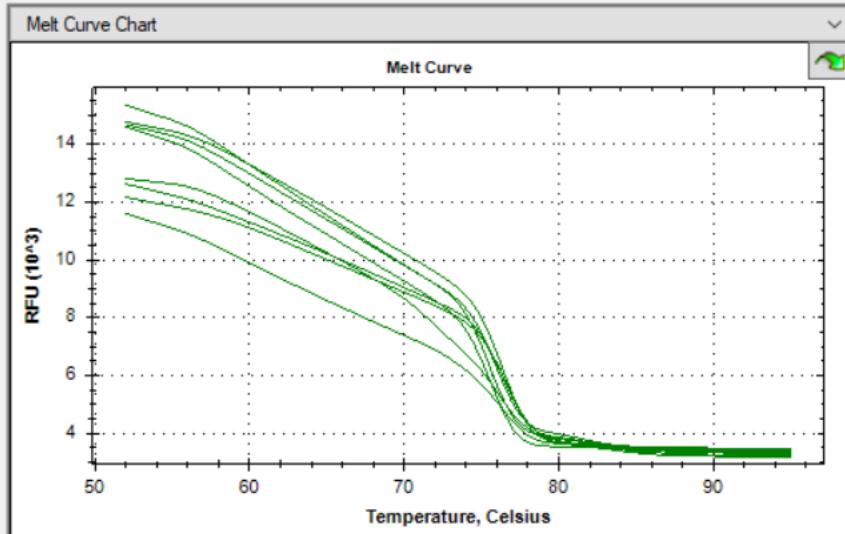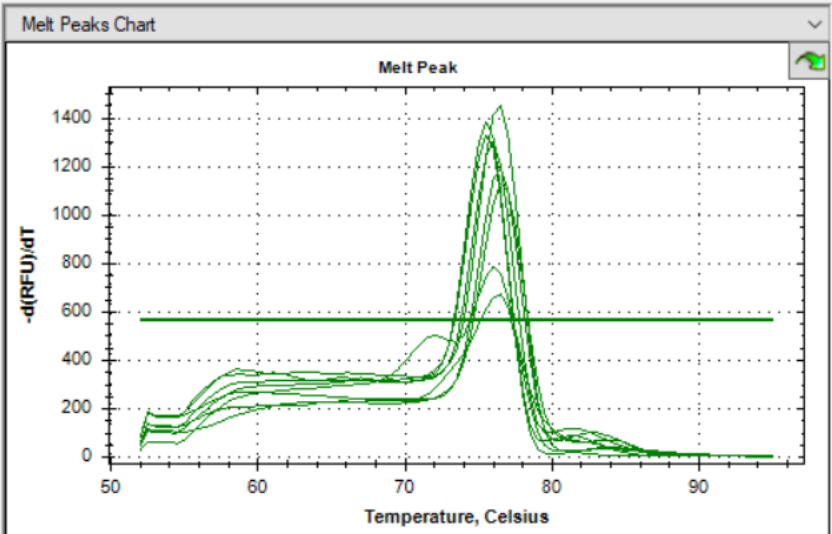

| Well | Fluor | Target | Content | Sample  | Cq    |
|------|-------|--------|---------|---------|-------|
| E01  | SYBR  | Ki67   | Unkn    | Control | 28.08 |
| E02  | SYBR  | Ki67   | Unkn    | TG      | 28.46 |
| E03  | SYBR  | Ki67   | Unkn    | IL      | 29.32 |
| E04  | SYBR  | Ki67   | Unkn    | IL+TG   | 28.13 |
| E05  | SYBR  | Ki67   | Unkn    | Control | 28.29 |
| E06  | SYBR  | Ki67   | Unkn    | TG      | 27.66 |
| E07  | SYBR  | Ki67   | Unkn    | IL      | 31.20 |
| E08  | SYBR  | Ki67   | Unkn    | IL+TG   | 28.13 |

| Well | Fluor | Target | Content | Sample  | Melt Temp |
|------|-------|--------|---------|---------|-----------|
| E01  | SYBR  | Ki67   | Unkn    | Control | 76.50     |
| E02  | SYBR  | Ki67   | Unkn    | TG      | 75.50     |
| E03  | SYBR  | Ki67   | Unkn    | IL      | 76.00     |
| E04  | SYBR  | Ki67   | Unkn    | IL+TG   | 75.50     |
| E05  | SYBR  | Ki67   | Unkn    | Control | 76.00     |
| E06  | SYBR  | Ki67   | Unkn    | TG      | 76.50     |
| E07  | SYBR  | Ki67   | Unkn    | IL      | 76.50     |
| E08  | SYBR  | Ki67   | Unkn    | IL+TG   | 76.50     |

|   | 1   | 2   | 3   | 4   | 5   | 6   | 7   | 8   | 9 | 10 | 11 | 12 |
|---|-----|-----|-----|-----|-----|-----|-----|-----|---|----|----|----|
| A | Unk | Unk | Unk | Unk | Unk | Unk | Unk | Unk |   |    |    |    |
| B | Unk | Unk | Unk | Unk | Unk | Unk | Unk | Unk |   |    |    |    |
| C | Unk | Unk | Unk | Unk | Unk | Unk | Unk | Unk |   |    |    |    |
| D | Unk | Unk | Unk | Unk | Unk | Unk | Unk | Unk |   |    |    |    |
| E | Unk | Unk | Unk | Unk | Unk | Unk | Unk | Unk |   |    |    |    |
| F | Unk | Unk | Unk | Unk | Unk | Unk | Unk | Unk |   |    |    |    |
| G | Unk | Unk | Unk | Unk | Unk | Unk | Unk | Unk |   |    |    |    |
| H | Unk | Unk | Unk | Unk | Unk | Unk | Unk | Unk |   |    |    |    |

File View Settings Export Tools

Well Group: All Wells Analysis Mode: Fluorophore View/Edit Plate... ?

Quantification Quantification Data Melt Curve Melt Curve Data Gene Expression End Point Custom Data View QC Run Information

Rows: 2 Columns: 3 Load a Preset View: <Select a preset View> Save as Preset... Manage Presets...

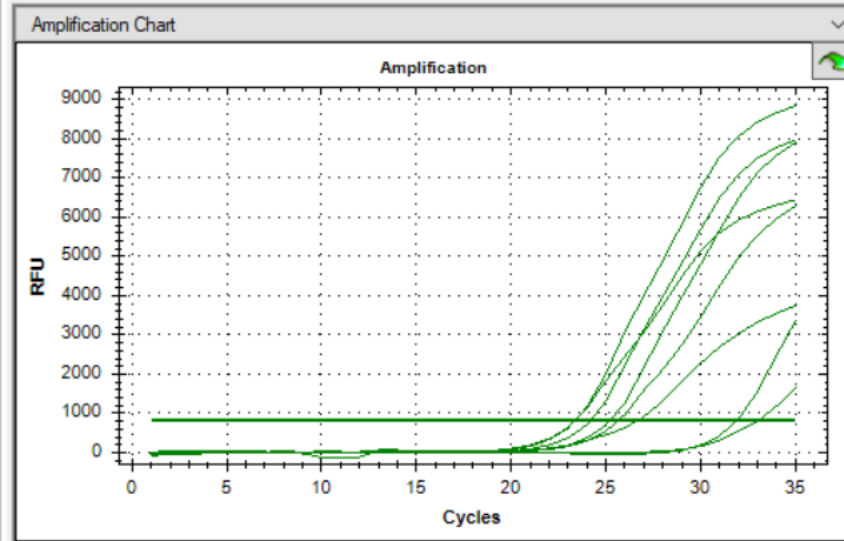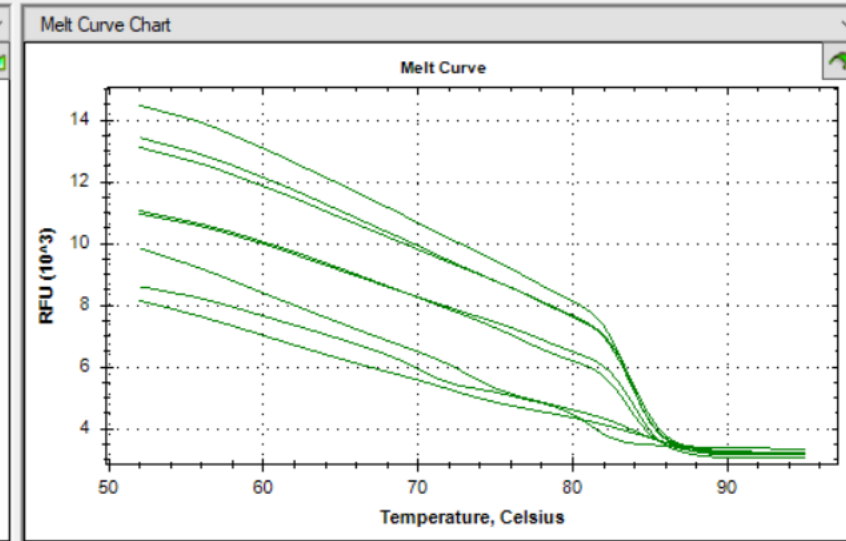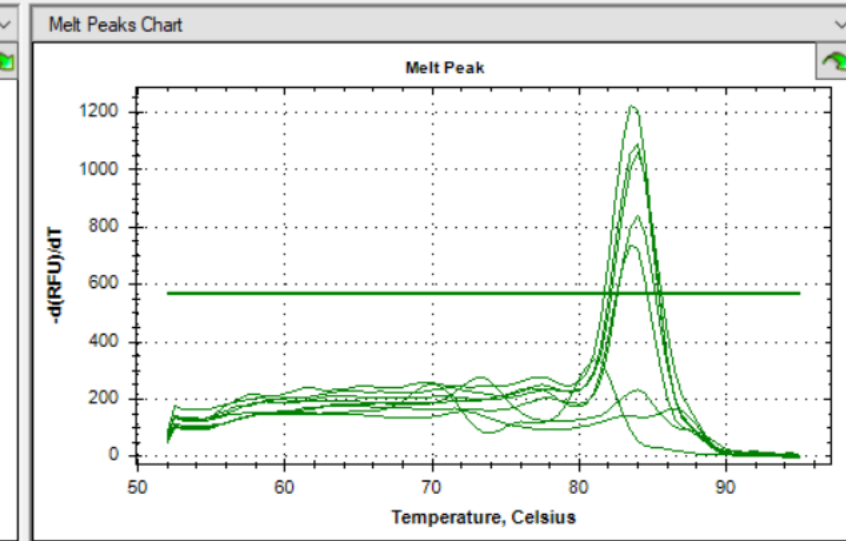

| Well | Fluor | Target | Content | Sample  | Cq    |
|------|-------|--------|---------|---------|-------|
| B01  | SYBR  | Actin  | Unkn    | Control | 23.34 |
| B02  | SYBR  | Actin  | Unkn    | TG      | 25.19 |
| B03  | SYBR  | Actin  | Unkn    | IL      | 31.86 |
| B04  | SYBR  | Actin  | Unkn    | IL+TG   | 24.16 |
| B05  | SYBR  | Actin  | Unkn    | Control | 23.34 |
| B06  | SYBR  | Actin  | Unkn    | TG      | 25.62 |
| B07  | SYBR  | Actin  | Unkn    | IL      | 33.01 |
| B08  | SYBR  | Actin  | Unkn    | IL+TG   | 26.63 |

| Well | Fluor | Target | Content | Sample  | Melt Temp |
|------|-------|--------|---------|---------|-----------|
| B01  | SYBR  | Actin  | Unkn    | Control | 83.50     |
| B02  | SYBR  | Actin  | Unkn    | TG      | 84.00     |
| B03  | SYBR  | Actin  | Unkn    | IL      | None      |
| B04  | SYBR  | Actin  | Unkn    | IL+TG   | 84.00     |
| B05  | SYBR  | Actin  | Unkn    | Control | 84.00     |
| B06  | SYBR  | Actin  | Unkn    | TG      | 83.50     |
| B07  | SYBR  | Actin  | Unkn    | IL      | None      |
| B08  | SYBR  | Actin  | Unkn    | IL+TG   | None      |

|   | 1   | 2   | 3   | 4   | 5   | 6   | 7   | 8   | 9 | 10 | 11 | 12 |
|---|-----|-----|-----|-----|-----|-----|-----|-----|---|----|----|----|
| A | Unk | Unk | Unk | Unk | Unk | Unk | Unk | Unk |   |    |    |    |
| B | Unk | Unk | Unk | Unk | Unk | Unk | Unk | Unk |   |    |    |    |
| C | Unk | Unk | Unk | Unk | Unk | Unk | Unk | Unk |   |    |    |    |
| D | Unk | Unk | Unk | Unk | Unk | Unk | Unk | Unk |   |    |    |    |
| E | Unk | Unk | Unk | Unk | Unk | Unk | Unk | Unk |   |    |    |    |
| F | Unk | Unk | Unk | Unk | Unk | Unk | Unk | Unk |   |    |    |    |
| G | Unk | Unk | Unk | Unk | Unk | Unk | Unk | Unk |   |    |    |    |
| H | Unk | Unk | Unk | Unk | Unk | Unk | Unk | Unk |   |    |    |    |



# **RT-PCR raw data for N-Cad, Vimentin, TGFR and B-Actin**

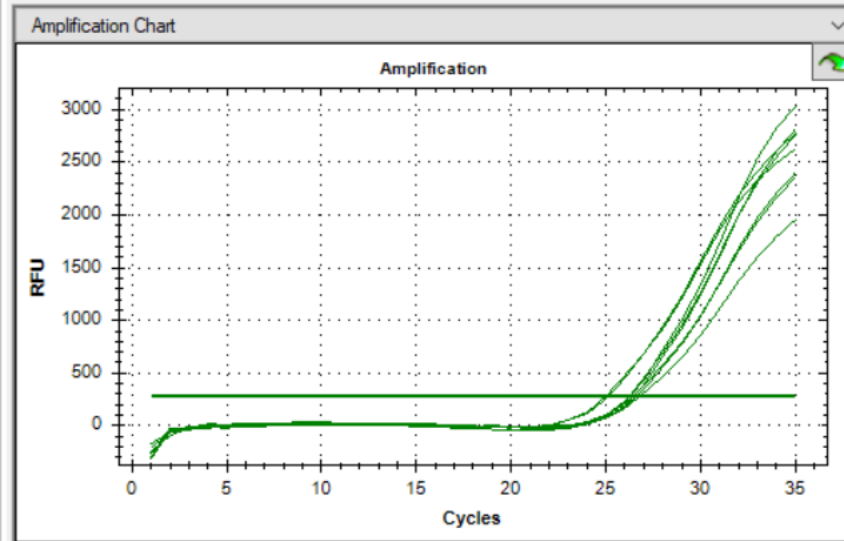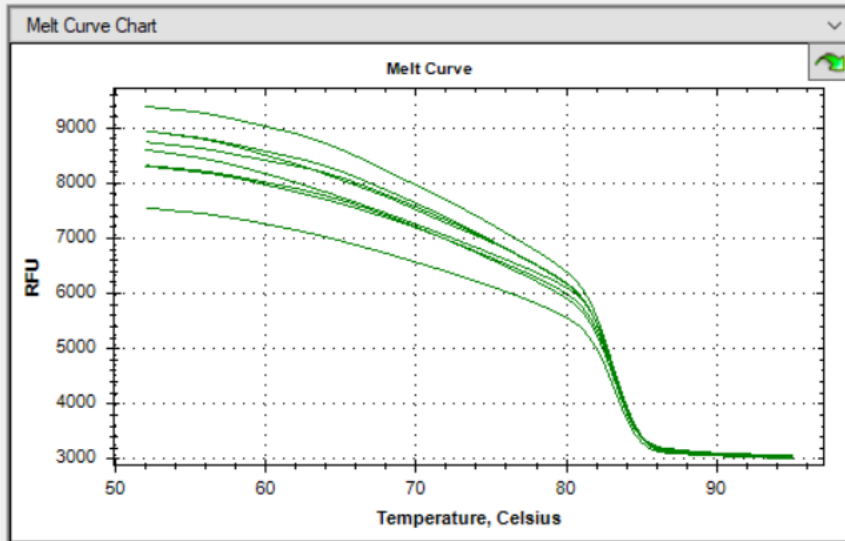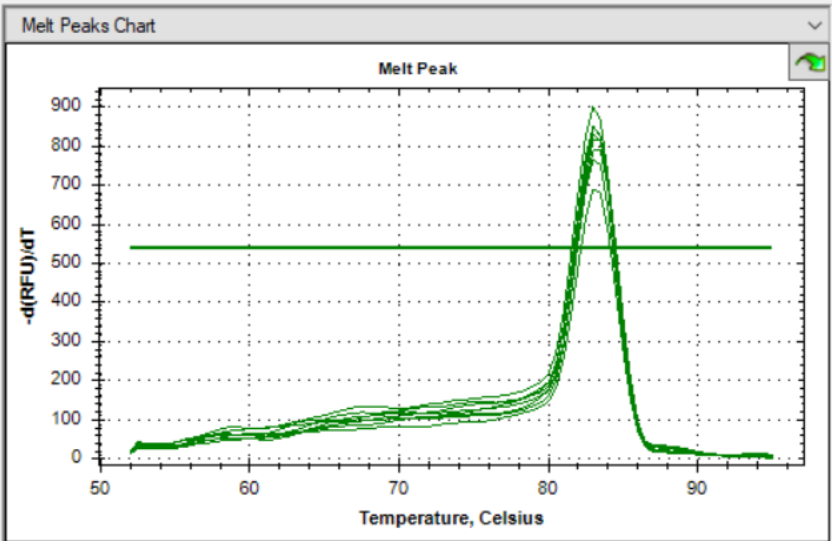

| Well | Fluor | Target | Content | Sample  | Cq    |
|------|-------|--------|---------|---------|-------|
| D01  | SYBR  | N-Cad  | Unkn    | Control | 26.46 |
| D02  | SYBR  | N-Cad  | Unkn    | TG      | 26.24 |
| D03  | SYBR  | N-Cad  | Unkn    | IL      | 26.26 |
| D04  | SYBR  | N-Cad  | Unkn    | IL+TG   | 25.12 |
| D05  | SYBR  | N-Cad  | Unkn    | Control | 26.62 |
| D06  | SYBR  | N-Cad  | Unkn    | TG      | 26.41 |
| D07  | SYBR  | N-Cad  | Unkn    | IL      | 26.78 |
| D08  | SYBR  | N-Cad  | Unkn    | IL+TG   | 25.00 |

| Well | Fluor | Target | Content | Sample  | Melt Temp |
|------|-------|--------|---------|---------|-----------|
| D01  | SYBR  | N-Cad  | Unkn    | Control | 83.00     |
| D02  | SYBR  | N-Cad  | Unkn    | TG      | 83.00     |
| D03  | SYBR  | N-Cad  | Unkn    | IL      | 83.00     |
| D04  | SYBR  | N-Cad  | Unkn    | IL+TG   | 83.00     |
| D05  | SYBR  | N-Cad  | Unkn    | Control | 83.00     |
| D06  | SYBR  | N-Cad  | Unkn    | TG      | 83.50     |
| D07  | SYBR  | N-Cad  | Unkn    | IL      | 83.00     |
| D08  | SYBR  | N-Cad  | Unkn    | IL+TG   | 83.50     |

|   | 1   | 2   | 3   | 4   | 5   | 6   | 7   | 8   | 9 | 10 | 11 | 12 |
|---|-----|-----|-----|-----|-----|-----|-----|-----|---|----|----|----|
| A | Unk | Unk | Unk | Unk | Unk | Unk | Unk | Unk |   |    |    |    |
| B | Unk | Unk | Unk | Unk | Unk | Unk | Unk | Unk |   |    |    |    |
| C | Unk | Unk | Unk | Unk | Unk | Unk | Unk | Unk |   |    |    |    |
| D | Unk | Unk | Unk | Unk | Unk | Unk | Unk | Unk |   |    |    |    |
| E | Unk | Unk | Unk | Unk | Unk | Unk | Unk | Unk |   |    |    |    |
| F | Unk | Unk | Unk | Unk | Unk | Unk | Unk | Unk |   |    |    |    |
| G | Unk | Unk | Unk | Unk | Unk | Unk | Unk | Unk |   |    |    |    |
| H | Unk | Unk | Unk | Unk | Unk | Unk | Unk | Unk |   |    |    |    |

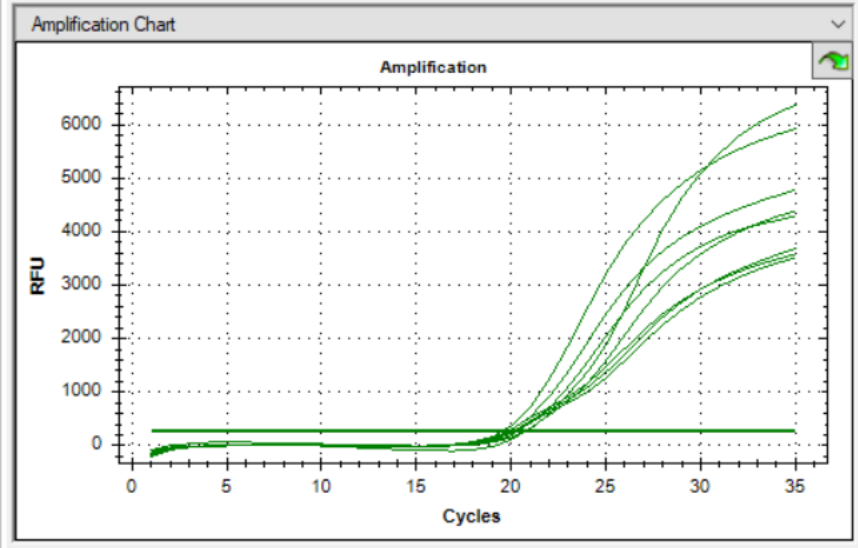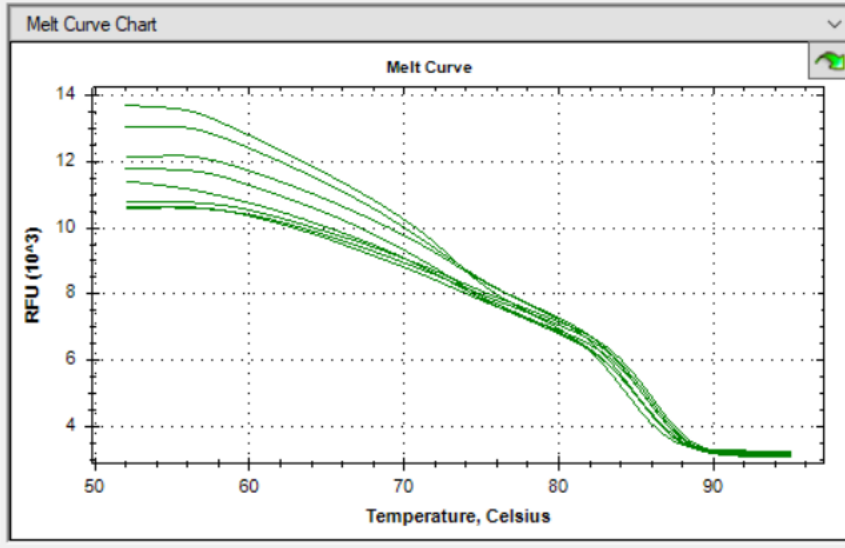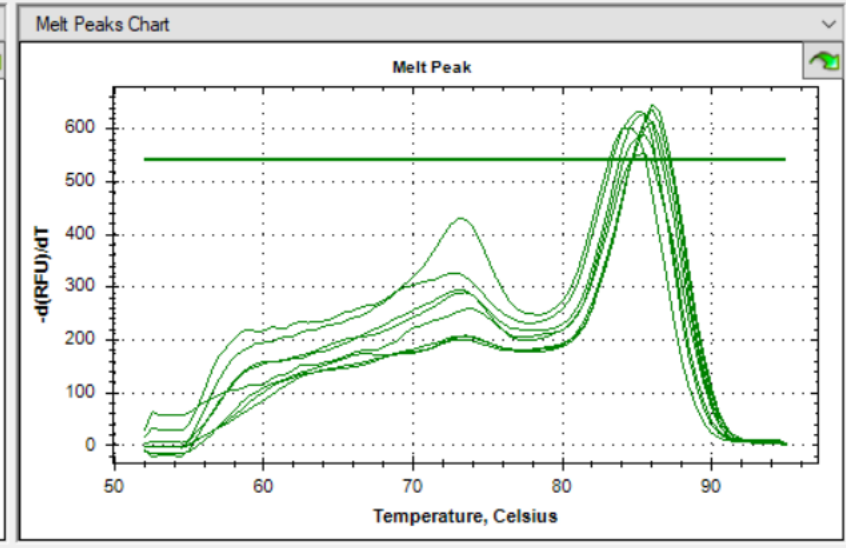

**Quantification Summary Results Grid**

| Well | Fluor | Target   | Content | Sample  | Cq    |
|------|-------|----------|---------|---------|-------|
| E01  | SYBR  | Vimentin | Unkn    | Control | 20.38 |
| E02  | SYBR  | Vimentin | Unkn    | TG      | 20.81 |
| E03  | SYBR  | Vimentin | Unkn    | IL      | 19.90 |
| E04  | SYBR  | Vimentin | Unkn    | IL+TG   | 19.58 |
| E05  | SYBR  | Vimentin | Unkn    | Control | 20.79 |
| E06  | SYBR  | Vimentin | Unkn    | TG      | 20.13 |
| E07  | SYBR  | Vimentin | Unkn    | IL      | 20.25 |
| E08  | SYBR  | Vimentin | Unkn    | IL+TG   | 19.87 |

**Melt Curve Summary Results Grid**

| Well | Fluor | Target   | Content | Sample  | Melt Temp |
|------|-------|----------|---------|---------|-----------|
| E01  | SYBR  | Vimentin | Unkn    | Control | 85.50     |
| E02  | SYBR  | Vimentin | Unkn    | TG      | 84.50     |
| E03  | SYBR  | Vimentin | Unkn    | IL      | 85.50     |
| E04  | SYBR  | Vimentin | Unkn    | IL+TG   | 85.00     |
| E05  | SYBR  | Vimentin | Unkn    | Control | 85.50     |
| E06  | SYBR  | Vimentin | Unkn    | TG      | 86.00     |
| E07  | SYBR  | Vimentin | Unkn    | IL      | 86.00     |
| E08  | SYBR  | Vimentin | Unkn    | IL+TG   | 86.00     |

**Well Selector**

|   | 1   | 2   | 3   | 4   | 5   | 6   | 7   | 8   | 9 | 10 | 11 | 12 |
|---|-----|-----|-----|-----|-----|-----|-----|-----|---|----|----|----|
| A | Unk | Unk | Unk | Unk | Unk | Unk | Unk | Unk |   |    |    |    |
| B | Unk | Unk | Unk | Unk | Unk | Unk | Unk | Unk |   |    |    |    |
| C | Unk | Unk | Unk | Unk | Unk | Unk | Unk | Unk |   |    |    |    |
| D | Unk | Unk | Unk | Unk | Unk | Unk | Unk | Unk |   |    |    |    |
| E | Unk | Unk | Unk | Unk | Unk | Unk | Unk | Unk |   |    |    |    |
| F | Unk | Unk | Unk | Unk | Unk | Unk | Unk | Unk |   |    |    |    |
| G | Unk | Unk | Unk | Unk | Unk | Unk | Unk | Unk |   |    |    |    |
| H | Unk | Unk | Unk | Unk | Unk | Unk | Unk | Unk |   |    |    |    |

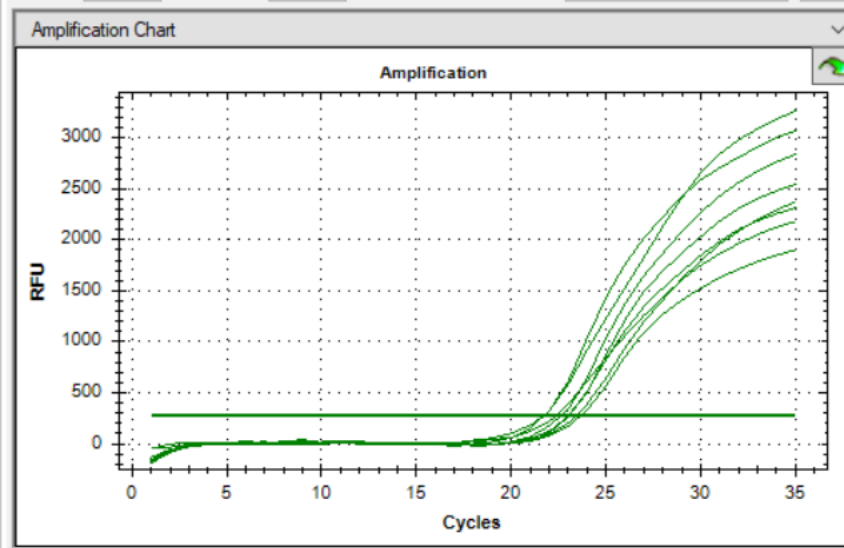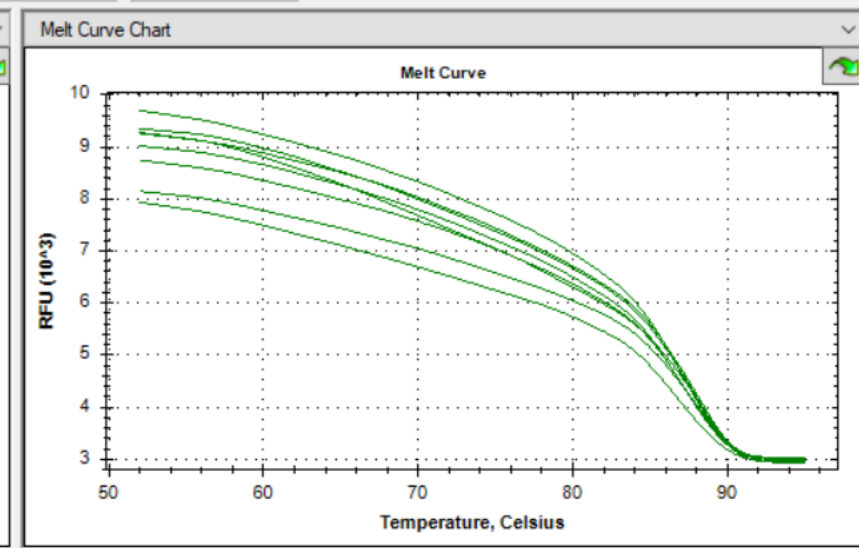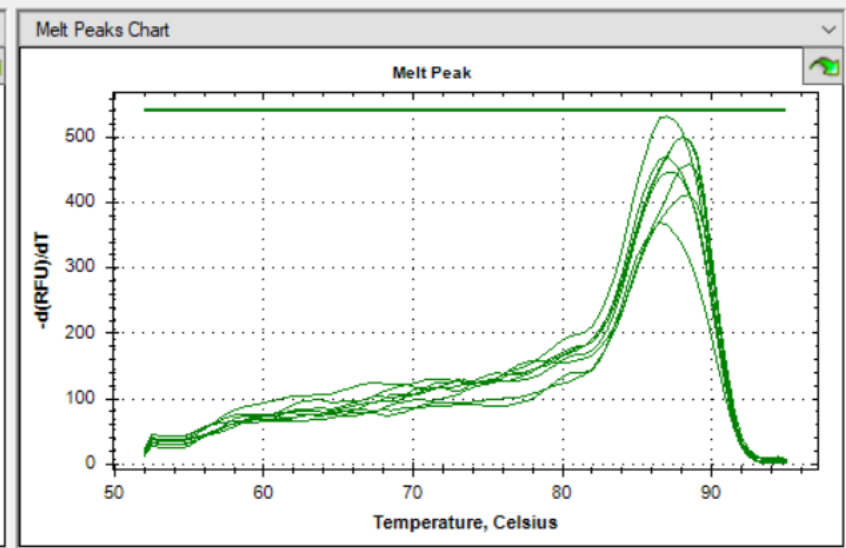

| Well | Fluor | Target | Content | Sample  | Cq    |
|------|-------|--------|---------|---------|-------|
| H01  | SYBR  | TGFR   | Unkn    | Control | 21.72 |
| H02  | SYBR  | TGFR   | Unkn    | TG      | 22.67 |
| H03  | SYBR  | TGFR   | Unkn    | IL      | 23.08 |
| H04  | SYBR  | TGFR   | Unkn    | IL+TG   | 21.75 |
| H05  | SYBR  | TGFR   | Unkn    | Control | 23.04 |
| H06  | SYBR  | TGFR   | Unkn    | TG      | 23.42 |
| H07  | SYBR  | TGFR   | Unkn    | IL      | 23.70 |
| H08  | SYBR  | TGFR   | Unkn    | IL+TG   | 22.37 |

| Well | Fluor | Target | Content | Sample  | Melt Temp |
|------|-------|--------|---------|---------|-----------|
| H01  | SYBR  | TGFR   | Unkn    | Control | None      |
| H02  | SYBR  | TGFR   | Unkn    | TG      | None      |
| H03  | SYBR  | TGFR   | Unkn    | IL      | None      |
| H04  | SYBR  | TGFR   | Unkn    | IL+TG   | None      |
| H05  | SYBR  | TGFR   | Unkn    | Control | None      |
| H06  | SYBR  | TGFR   | Unkn    | TG      | None      |
| H07  | SYBR  | TGFR   | Unkn    | IL      | None      |
| H08  | SYBR  | TGFR   | Unkn    | IL+TG   | None      |

|   | 1   | 2   | 3   | 4   | 5   | 6   | 7   | 8   | 9 | 10 | 11 | 12 |
|---|-----|-----|-----|-----|-----|-----|-----|-----|---|----|----|----|
| A | Unk | Unk | Unk | Unk | Unk | Unk | Unk | Unk |   |    |    |    |
| B | Unk | Unk | Unk | Unk | Unk | Unk | Unk | Unk |   |    |    |    |
| C | Unk | Unk | Unk | Unk | Unk | Unk | Unk | Unk |   |    |    |    |
| D | Unk | Unk | Unk | Unk | Unk | Unk | Unk | Unk |   |    |    |    |
| E | Unk | Unk | Unk | Unk | Unk | Unk | Unk | Unk |   |    |    |    |
| F | Unk | Unk | Unk | Unk | Unk | Unk | Unk | Unk |   |    |    |    |
| G | Unk | Unk | Unk | Unk | Unk | Unk | Unk | Unk |   |    |    |    |
| H | Unk | Unk | Unk | Unk | Unk | Unk | Unk | Unk |   |    |    |    |

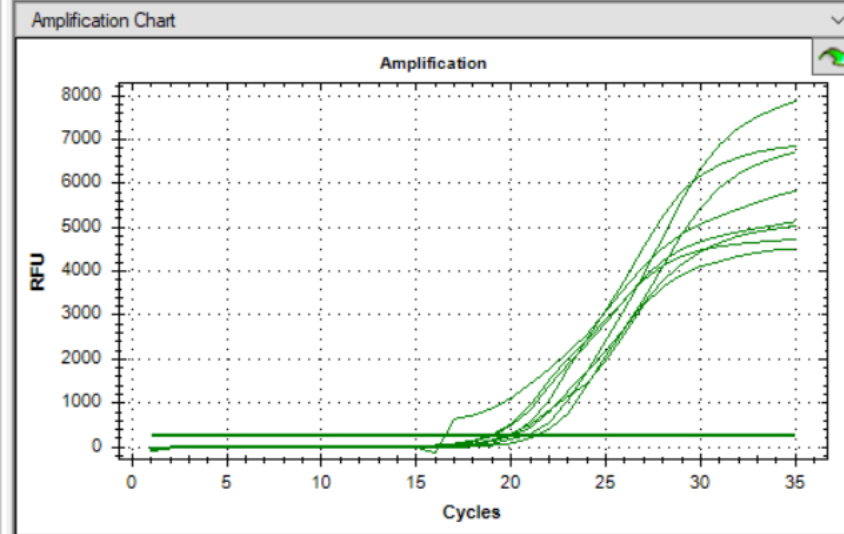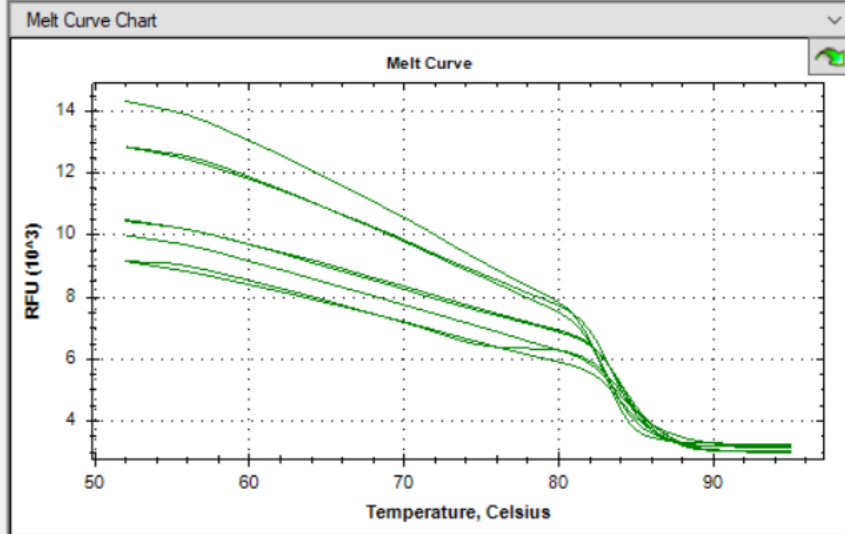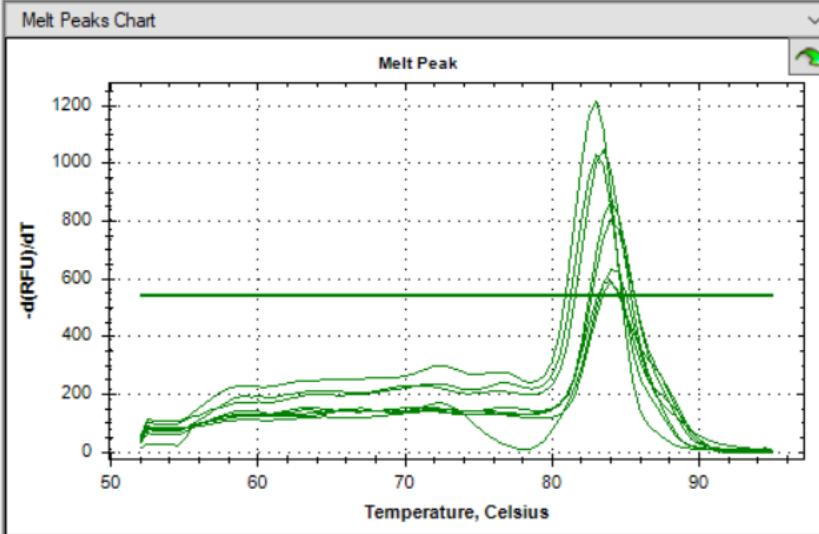

Quantification Summary Results Grid

| Well | Fluor | Target | Content | Sample  | Cq    |
|------|-------|--------|---------|---------|-------|
| B01  | SYBR  | Actin  | Unkn    | Control | 19.00 |
| B02  | SYBR  | Actin  | Unkn    | TG      | 21.37 |
| B03  | SYBR  | Actin  | Unkn    | IL      | 20.88 |
| B04  | SYBR  | Actin  | Unkn    | IL+TG   | 20.05 |
| B05  | SYBR  | Actin  | Unkn    | Control | 19.11 |
| B06  | SYBR  | Actin  | Unkn    | TG      | 20.14 |
| B07  | SYBR  | Actin  | Unkn    | IL      | 19.80 |
| B08  | SYBR  | Actin  | Unkn    | IL+TG   | 16.53 |

Melt Curve Summary Results Grid

| Well | Fluor | Target | Content | Sample  | Melt Temp |
|------|-------|--------|---------|---------|-----------|
| B01  | SYBR  | Actin  | Unkn    | Control | 84.00     |
| B02  | SYBR  | Actin  | Unkn    | TG      | 83.00     |
| B03  | SYBR  | Actin  | Unkn    | IL      | 83.00     |
| B04  | SYBR  | Actin  | Unkn    | IL+TG   | 83.50     |
| B05  | SYBR  | Actin  | Unkn    | Control | 84.00     |
| B06  | SYBR  | Actin  | Unkn    | TG      | 84.00     |
| B07  | SYBR  | Actin  | Unkn    | IL      | 84.00     |
| B08  | SYBR  | Actin  | Unkn    | IL+TG   | 84.00     |

Well Selector

|   | 1   | 2   | 3   | 4   | 5   | 6   | 7   | 8   | 9 | 10 | 11 | 12 |
|---|-----|-----|-----|-----|-----|-----|-----|-----|---|----|----|----|
| A | Unk | Unk | Unk | Unk | Unk | Unk | Unk | Unk |   |    |    |    |
| B | Unk | Unk | Unk | Unk | Unk | Unk | Unk | Unk |   |    |    |    |
| C | Unk | Unk | Unk | Unk | Unk | Unk | Unk | Unk |   |    |    |    |
| D | Unk | Unk | Unk | Unk | Unk | Unk | Unk | Unk |   |    |    |    |
| E | Unk | Unk | Unk | Unk | Unk | Unk | Unk | Unk |   |    |    |    |
| F | Unk | Unk | Unk | Unk | Unk | Unk | Unk | Unk |   |    |    |    |
| G | Unk | Unk | Unk | Unk | Unk | Unk | Unk | Unk |   |    |    |    |
| H | Unk | Unk | Unk | Unk | Unk | Unk | Unk | Unk |   |    |    |    |

# Analysis of RT-PCR data

|    | A          | B        | C        | D        | E        | F        | G        |
|----|------------|----------|----------|----------|----------|----------|----------|
| 1  | 23.10.2020 | B-Actin  |          | Average  |          |          |          |
| 2  | Control    | 23.01705 | 22.76345 | 22.89025 | 0        |          |          |
| 3  | TGF        | 24.52315 | 23.84369 | 24.18342 | -1.29317 |          |          |
| 4  | IL6        | 32.02353 | 30.93007 | 31.4768  | -8.58655 |          |          |
| 5  | IL+TG      | 23.53371 | 22.52659 | 23.03015 | -0.1399  |          |          |
| 6  |            |          |          |          |          |          |          |
| 7  |            | IL6R     |          |          |          |          |          |
| 8  | Control    | 26.28971 | 26.4026  | 26.34616 | 0        | 0        | 1        |
| 9  | TGF        | 26.44641 | 26.18687 | 26.31664 | 0.029517 | 2.41764  | 5.342962 |
| 10 | IL6        | 26.27796 | 26.10805 | 26.19301 | 0.153151 | 8.290549 | 313.1151 |
| 11 | IL+TG      | 26.63457 | 27.30994 | 26.97226 | -0.6261  | 0.095647 | 1.068544 |
| 12 |            |          |          |          |          |          |          |
| 13 |            | gp130    |          |          |          |          |          |
| 14 | Control    | 21.61224 | 21.1439  | 21.37807 | 0        | 0        | 1        |
| 15 | TGF        | 22.39862 | 21.56415 | 21.98138 | -0.60331 | 1.784808 | 3.445726 |
| 16 | IL6        | 21.90933 | 21.64164 | 21.77549 | -0.39742 | 7.739978 | 213.7792 |
| 17 | IL+TG      | 21.6091  | 20.68955 | 21.14933 | 0.228741 | 0.950486 | 1.932524 |
| 18 |            |          |          |          |          |          |          |

|    | A          | B        | C        | D        | E        | F        | G        |
|----|------------|----------|----------|----------|----------|----------|----------|
| 13 |            |          |          |          |          |          |          |
| 14 | 22.10.2020 | B-Actin  |          |          |          |          |          |
| 15 | Control    | 23.34234 | 23.34239 | 23.34237 | 0        |          |          |
| 16 | TGF        | 25.18908 | 25.61695 | 25.40302 | -2.06065 |          |          |
| 17 | IL6        | 31.86427 | 33.00877 | 32.43652 | -9.09415 |          |          |
| 18 | IL+TG      | 24.16495 | 26.62763 | 25.39629 | -2.05392 |          |          |
| 19 |            |          |          |          |          |          |          |
| 20 |            | PCNA     |          |          |          |          |          |
| 21 | Control    | 26.27984 | 27.34326 | 26.81155 | 0        | 0        | 1        |
| 22 | TGF        | 26.52684 | 26.15262 | 26.33973 | 0.471817 | 2.532466 | 5.785599 |
| 23 | IL6        | 27.12955 | 25.94995 | 26.53975 | 0.271796 | 9.365949 | 659.8292 |
| 24 | IL+TG      | 28.00642 | 26.44302 | 27.22472 | -0.41317 | 1.640751 | 3.118281 |
| 25 |            |          |          |          |          |          |          |
| 26 |            | Ki67     |          |          |          |          |          |
| 27 | Control    | 28.07971 | 28.28772 | 28.18372 | 0        | 0        | 1        |
| 28 | TGF        | 28.46172 | 27.6639  | 28.06281 | 0.120908 | 2.181558 | 4.53643  |
| 29 | IL6        | 29.32152 | 31.19547 | 30.2585  | -2.07478 | 7.019375 | 129.7306 |
| 30 | IL+TG      | 28.13156 | 28.13395 | 28.13276 | 0.05096  | 2.104884 | 4.301632 |

|  |            |             |          |          |          |          |          |
|--|------------|-------------|----------|----------|----------|----------|----------|
|  | 19.10.2020 | B-Actin     |          |          |          |          |          |
|  | Control    | 19.00414012 | 19.11056 | 19.05735 | 0        |          |          |
|  | TGF        | 21.37081703 | 20.14474 | 20.75778 | -1.70043 |          |          |
|  | IL6        | 20.87730744 | 19.79689 | 20.3371  | -1.27975 |          |          |
|  | IL+TG      | 20.05448726 | 16.53382 | 18.29415 | 0.763196 |          |          |
|  |            |             |          |          |          |          |          |
|  |            | N-Cad       |          |          |          |          |          |
|  | Control    | 26.46       | 26.62    | 26.54    | 0        | 0        | 1        |
|  | TGF        | 26.24       | 26.41    | 26.325   | 0.215    | 1.915427 | 3.772253 |
|  | IL6        | 26.26       | 26.78    | 26.52    | 0.02     | 1.299751 | 2.461864 |
|  | IL+TG      | 25.12       | 25       | 25.06    | 1.48     | 0.716804 | 1.643537 |
|  |            |             |          |          |          |          |          |
|  |            | Vimentin    |          |          |          |          |          |
|  | Control    | 20.38       | 20.79    | 20.585   | 0        | 0        | 1        |
|  | TGF        | 20.81       | 20.13    | 20.47    | 0.115    | 1.815427 | 3.519637 |
|  | IL6        | 19.9        | 20.25    | 20.075   | 0.51     | 1.789751 | 3.457552 |
|  | IL+TG      | 19.58       | 19.87    | 19.725   | 0.86     | 0.096804 | 1.069402 |
|  |            |             |          |          |          |          |          |
|  |            | TGFR        |          |          |          |          |          |
|  | Control    | 21.72       | 23.04    | 22.38    | 0        | 0        | 1        |
|  | TGF        | 22.67       | 23.42    | 23.045   | -0.665   | 1.035427 | 2.04972  |
|  | IL6        | 23.08       | 23.7     | 23.39    | -1.01    | 0.269751 | 1.2056   |
|  | IL+TG      | 21.75       | 22.37    | 22.06    | 0.32     | -0.4432  | 0.735503 |
